# Supplementary material for: Venus flytrap carnivorous lifestyle builds on herbivore defense strategies
Source: HighWire-hosted journal article supplement (doi:10.1101/gr.202200.115), 2016-05-04
Supplement: Supp_Fig_S2.pdf [file Supp_Fig_S2.pdf]

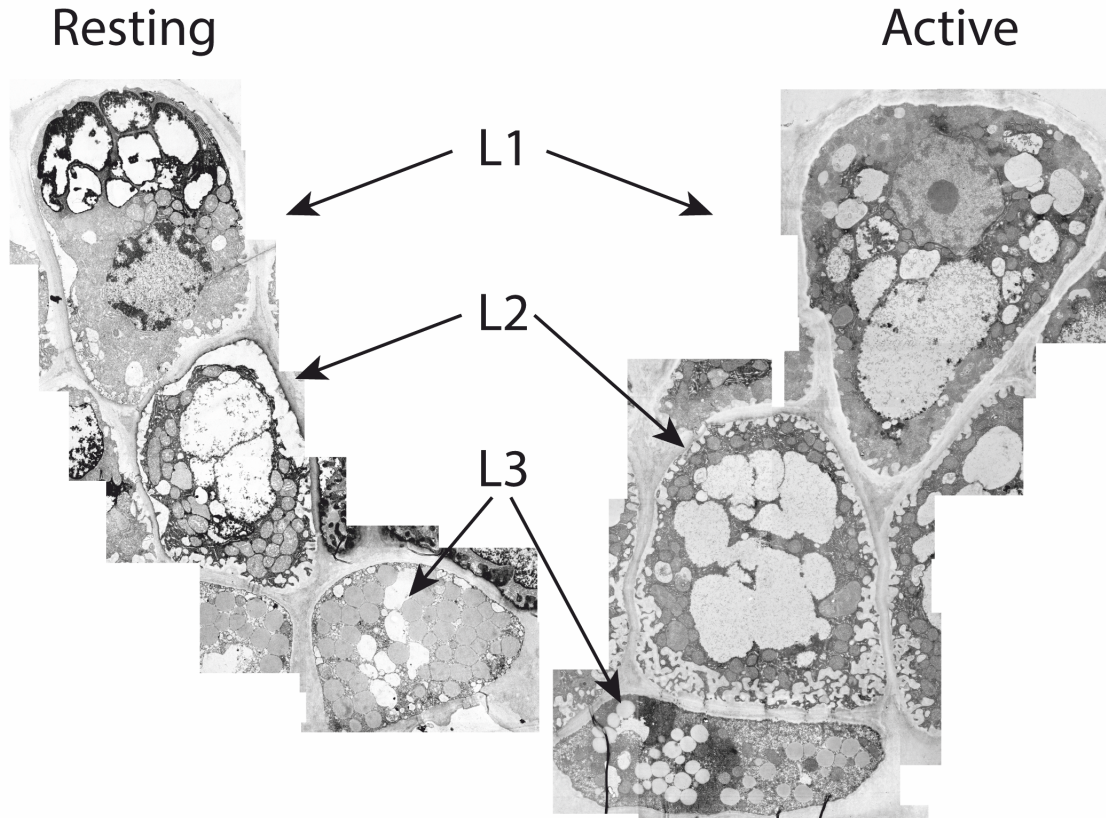

**Suppl. Figure 2:** TEM of non-stimulated versus stimulated glands TEM micrographs of gland sections in non-stimulated (left) and active (insect digesting; right) modes. Functional gland layers L1 - L3 are indicated by arrows. Note the massive plasma membrane invagination in L2 cells.
