# Supplementary material for: Venus flytrap carnivorous lifestyle builds on herbivore defense strategies
Source: HighWire-hosted journal article supplement (doi:10.1101/gr.202200.115), 2016-05-04
Supplement: Supplemental_Fig_S1.pdf [file Supplemental_Fig_S1.pdf]

# PCA (Resting Flytrap Tissues)

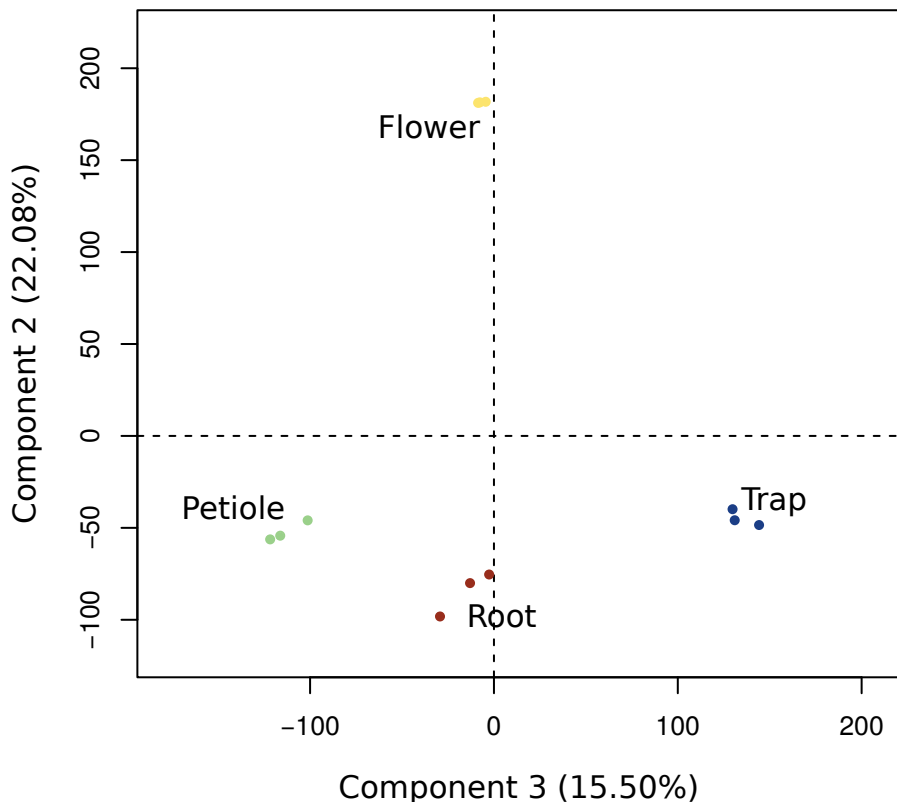

**Suppl. Figure 1:** PCA of all non-stimulated *Dionaea muscipula* tissues. Components two and three of the principal component analysis of all non-stimulated Venus flytrap tissues. Note that the third component separates the trap from all other tissues, describing up to 15.5% of the overall variance.
