# Supplementary material for: Venus flytrap carnivorous lifestyle builds on herbivore defense strategies
Source: HighWire-hosted journal article supplement (doi:10.1101/gr.202200.115), 2016-05-04
Supplement: Supplemental_Table_S1.xlsx [file Supplemental_Table_S1.xlsx]

## Sheet: S1 Sequencing
Experiment ID	Tissue	Condition	Replicate	SRA ID	Read Pairs
exp001	Petiole	Resting	1	SRR2807633	48249836
			2	SRR2807634	43846727
			3	SRR2807644	109174125
	Flower	Resting	1	SRR2807648	82344072
	Flower		2	SRR2807650	94576872
	Flower		3	SRR2807649	82183197
	Roots	Resting	1	SRR2807642	60765302
			2	SRR2807641	42496016
			3	SRR2807643	71275544
	Rim	Resting	1	SRR2807654	59582735
			2	SRR2807655	79822192
			3	SRR2807656	94468755
	Traps	Resting	1	SRR2807638	65538410
			2	SRR2807639	85082118
			3	SRR2807640	48264648
		Coronatin- Stimulated	1	SRR2807651	68174440
			2	SRR2807652	76033562
			3	SRR2807653	51132019
	Glands	Resting	1	SRR2807635	61104656
			2	SRR2807636	46414468
			3	SRR2807637	67264172
exp002	Pooled Tissues	Pooled Conditions	1	SRR2795277	91624980
exp003	Glands	Resting	1	SRR2807627	56579279
			2	SRR2807628	57727793
			3	SRR2807630	56602986
		Coronatin- Stimulated	1	SRR2807629	51821988
			2	SRR2807632	53260935
			3	SRR2807631	60636940
exp004	Traps	Resting	1	SRR2807621	53162749
			2	SRR2807622	48202899
			3	SRR2807623	61188245
		Insect- Stimulated	1	SRR2807624	40138272
			2	SRR2807625	57466411
			3	SRR2807626	42863945
exp008	Glands	Resting	1	SRS1131959	179188714
			2	SRR2807657	176247961
			3	SRR2807659	176206340
		Insect- Stimulated	1	SRR2807660	198188982
			2	SRR2807662	195144623
			3	SRR2807662	164505395
					3258553303
