# Supplementary material for: Venus flytrap carnivorous lifestyle builds on herbivore defense strategies
Source: HighWire-hosted journal article supplement (doi:10.1101/gr.202200.115), 2016-05-04
Supplement: Supplemental_Table_S2.xlsx [file Supplemental_Table_S2.xlsx]

## Sheet: PCA Enrichment
Component 1 (35%) - Gene Ontology: Plant GO Slim / Aspect: Biological Function
Root and Flower (left side)							Petiole and Trap (right side)
GO.ID	Term	Annotated	Significant	Expected	adj. P-Value		GO.ID	Term	Annotated	Significant	Expected	adj. P-Value
GO:0007049	cell cycle	435	184	122.6	5.6e-11		GO:0015979	photosynthesis	370	138	59.13	1.164e-22
GO:0006464	cellular protein modification process	1205	397	339.61	4.3e-05		GO:0006412	translation	623	157	99.55	3.88e-08
Component 2 (22%) - Gene Ontology: Plant GO Slim / Aspect: Biological Function
Flower (left side)							Petiole, Root and Trap (right side)
GO.ID	Term	Annotated	Significant	Expected	adj. P-Value		GO.ID	Term	Annotated	Significant	Expected	adj. P-Value
GO:0040029	regulation of gene expression, epigeneti...	153	72	36.17	8.73e-09		GO:0009991	response to extracellular stimulus	80	33	15.69	0.0005723
GO:0007049	cell cycle	279	107	65.96	8.536e-07		GO:0007154	cell communication	567	127	111.2	0.002619
GO:0006259	DNA metabolic process	303	113	71.64	2.037e-06
GO:0030154	cell differentiation	278	103	65.73	1.358e-05
GO:0009653	anatomical structure morphogenesis	489	161	115.61	3.88e-05
GO:0016043	cellular component organization	911	272	215.38	5.141e-05
GO:0007275	multicellular organismal development	962	294	227.44	0.002716
GO:0009908	flower development	281	95	66.43	0.00388
Component 3 (15%) - Supplementary Figure 1 -Gene Ontology: Plant GO Slim / Aspect: Biological Function
Petiole, Root and Flower (left side)							Trap (right side)
GO.ID	Term	Annotated	Significant	Expected	adj. P-Value		GO.ID	Term	Annotated	Significant	Expected	adj. P-Value
NA	NA	NA	NA	NA	NA		GO:0009605	response to external stimulus	232	76	52.48	7.8e-06
							GO:0006091	generation of precursor metabolites and ...	171	62	38.68	1.8e-05
