# Supplementary material for: Venus flytrap carnivorous lifestyle builds on herbivore defense strategies
Source: HighWire-hosted journal article supplement (doi:10.1101/gr.202200.115), 2016-05-04
Supplement: Supplemental_Table_S3.xlsx [file Supplemental_Table_S3.xlsx]

## Sheet: Unique Flower DEG's
Gene Ontology: Plant GO Slim / Aspect: Biological Function
GO.ID	Term	Annotated	Significant	Expected	adj. P-Value
GO:0009653	anatomical structure morphogenesis	1286	88	48.78	1.957e-06
GO:0016049	cell growth	537	40	20.37	0.003399
GO:0007049	cell cycle	676	46	25.64	0.00824
