# Supplementary material for: Venus flytrap carnivorous lifestyle builds on herbivore defense strategies
Source: HighWire-hosted journal article supplement (doi:10.1101/gr.202200.115), 2016-05-04
Supplement: Supplemental_Table_S4.xlsx [file Supplemental_Table_S4.xlsx]

## Sheet: Shared Gland and Root
Gene Ontology: Plant GO Slim / Aspect: Biological Function
ID	Term	Annotated	Significant	Expected	adj. P-Value
GO:0019538	protein metabolic process	3361	1282	1123.66	2.5e-11
GO:0006810	transport	2416	929	807.73	3.4e-07
GO:0006950	response to stress	2567	970	858.21	8.5e-06
Gene Families: MapMan Bins / Level: 3
ID	Term	Annotated	Significant	P-Value	Q-Value
20.2.1	stress / abiotic / heat	120	27	0.00464848	0.0201434
20.2.3	stress / abiotic / drought/salt	43	12	0.0608916	0.0897167
27.3.32	RNA / regulation of transcription / WRKY domain transcription factor family	23	12	0.0621116	0.0897167
27.3.99	RNA / regulation of transcription / unclassified	115	56	2.28727e-06	2.97344e-05
27.3.67	RNA / regulation of transcription / putative transcription regulator	78	29	0.00296516	0.0154188
27.3.11	RNA / regulation of transcription / C2H2 zinc finger family	35	19	0.038081	0.0707218
27.3.6	RNA / regulation of transcription / bHLH,Basic Helix-Loop-Helix family	25	11	0.0178305	0.0422731
27.3.3	RNA / regulation of transcription / AP2/EREBP, APETALA2/Ethylene-responsive element binding protein family	22	13	0.00691484	0.0249414
29.3.4	protein / targeting / secretory pathway	95	42	1.74331e-05	0.000151087
29.2.2	protein / synthesis / ribosome biogenesis	79	28	0.00767427	0.0249414
29.2.1	protein / synthesis / ribosomal protein	646	92	5.00637e-05	0.000325414
29.2.3	protein / synthesis / initiation	87	20	0.0196495	0.0422731
29.4.1	protein / postranslational modification / kinase	62	23	0.0192946	0.0422731
29.5.11	protein / degradation / ubiquitin	345	145	1.74592e-12	4.53939e-11
35.1.5	not assigned / no ontology / pentatricopeptide (PPR) repeat-containing protein	133	67	0.0186907	0.0422731
