# Supplementary material for: Venus flytrap carnivorous lifestyle builds on herbivore defense strategies
Source: HighWire-hosted journal article supplement (doi:10.1101/gr.202200.115), 2016-05-04
Supplement: Supplemental_Table_S5.xlsx [file Supplemental_Table_S5.xlsx]

## Sheet: Beta Oxidation
Unigene	Representative Isoform	Synonym	Description	CRB Ortholog
comp228413_c2	comp228413_c2_seq1	SDP1	Patatin-like phospholipase family protein	AT5G04040
comp220150_c0	comp220150_c0_seq1	PXA1	peroxisomal ABC transporter 1	AT4G39850
comp229582_c2.1	comp229582_c2.1_seq2	LACS7, ATLACS7	long-chain acyl-CoA synthetase 7	AT5G27600
comp229359_c0	comp229359_c0_seq4	ACX1	acyl-CoA oxidase 1	AT4G16760
comp231854_c0.0	comp231854_c0.0_seq1	AIM1	Enoyl-CoA hydratase/isomerase family	AT4G29010
comp208017_c0	comp208017_c0_seq1	PKT3, PED1, KAT2	peroxisomal 3-ketoacyl-CoA thiolase 3	AT2G33150
comp229669_c2.0	comp223567_c0_seq4	ATMDAR4, MDAR4	monodehydroascorbate reductase 4	AT3G27820
comp219920_c0.1	comp219920_c0.1_seq1	PMDH1	peroxisomal NAD-malate dehydrogenase 1	AT2G22780
comp200652_c0	comp200652_c0_seq1	MLS	malate synthase	AT5G03860
comp223567_c0	comp223567_c0_seq2	ICL	isocitrate lyase	AT3G21720
comp230016_c0.0	comp230016_c0.0_seq1	CSY2	citrate synthase 2	AT3G58750
comp234028_c1.1	comp234028_c1.1_seq4	MFP2, ATMFP2	multifunctional protein 2	AT3G06860
