# Supplementary material for: Venus flytrap carnivorous lifestyle builds on herbivore defense strategies
Source: HighWire-hosted journal article supplement (doi:10.1101/gr.202200.115), 2016-05-04
Supplement: Supplemental_Table_S6.xlsx [file Supplemental_Table_S6.xlsx]

## Sheet: Enrichment Insect-stimulated Gland
Gene Ontology: Generic GO / Aspect: Biological Function
GO.ID	Term	Annotated	Significant	Expected	adj. P-Value
GO:0034976	response to endoplasmic reticulum stress	160	64	25.18	1.4e-09
GO:0046686	response to cadmium ion	457	112	71.91	4.6e-07
GO:0080167	response to karrikin	104	36	16.37	1.6e-06
GO:0009738	abscisic acid-activated signaling pathwa...	135	42	21.24	2.2e-06
GO:0009611	response to wounding	177	55	27.85	2.5e-06
GO:0010200	response to chitin	154	46	24.23	6.6e-06
GO:0030968	endoplasmic reticulum unfolded protein r...	77	28	12.12	7.7e-06
GO:0071805	potassium ion transmembrane transport	38	17	5.98	1.2e-05
GO:0055085	transmembrane transport	636	153	100.08	4.4e-05
GO:0006090	pyruvate metabolic process	325	43	51.14	1.0e-04
GO:0009620	response to fungus	249	63	39.18	0.00012
GO:0015824	proline transport	33	14	5.19	0.00023
GO:0043069	negative regulation of programmed cell d...	76	24	11.96	0.00042
GO:0042939	tripeptide transport	6	5	0.94	0.00050
GO:0009753	response to jasmonic acid	209	54	32.89	0.00051
GO:0042538	hyperosmotic salinity response	78	24	12.27	0.00063
GO:0009407	toxin catabolic process	83	25	13.06	0.00070
GO:1901700	response to oxygen-containing compound	1251	270	196.86	0.00080
GO:0052542	defense response by callose deposition	40	13	6.29	0.00084
GO:0035556	intracellular signal transduction	446	104	70.18	0.00100
GO:0010033	response to organic substance	1533	298	241.23	0.00110
GO:0010359	regulation of anion channel activity	16	8	2.52	0.00145
GO:0009627	systemic acquired resistance	176	44	27.7	0.00151
GO:0010167	response to nitrate	60	19	9.44	0.00155
GO:0006222	UMP biosynthetic process	14	7	2.2	0.00178
GO:0042938	dipeptide transport	5	4	0.79	0.00267
GO:0009861	jasmonic acid and ethylene-dependent sys...	5	4	0.79	0.00267
GO:0045226	extracellular polysaccharide biosyntheti...	5	4	0.79	0.00267
GO:0050832	defense response to fungus	170	38	26.75	0.00334
GO:0010152	pollen maturation	11	6	1.73	0.00340
GO:0006886	intracellular protein transport	624	113	98.19	0.00348
GO:0042128	nitrate assimilation	8	5	1.26	0.00354
GO:0009704	de-etiolation	8	5	1.26	0.00354
GO:0016099	monoterpenoid biosynthetic process	8	5	1.26	0.00354
GO:0009409	response to cold	422	76	66.41	0.00372
GO:0015711	organic anion transport	213	60	33.52	0.00373
GO:0043132	NAD transport	3	3	0.47	0.00389
GO:0060416	response to growth hormone	3	3	0.47	0.00389
GO:0080148	negative regulation of response to water...	3	3	0.47	0.00389
GO:0071310	cellular response to organic substance	715	130	112.51	0.00451
GO:0010363	regulation of plant-type hypersensitive ...	144	35	22.66	0.00473
GO:0006099	tricarboxylic acid cycle	39	13	6.14	0.00506
GO:0002679	respiratory burst involved in defense re...	31	11	4.88	0.00568
GO:0009723	response to ethylene	162	40	25.49	0.00613
GO:0009695	jasmonic acid biosynthetic process	63	18	9.91	0.00691
GO:0006032	chitin catabolic process	9	5	1.42	0.00693
GO:0006535	cysteine biosynthetic process from serin...	9	5	1.42	0.00693
GO:0030433	ER-associated ubiquitin-dependent protei...	9	5	1.42	0.00693
GO:0015865	purine nucleotide transport	11	5	1.73	0.00701
GO:0009435	NAD biosynthetic process	6	4	0.94	0.00702
GO:0005975	carbohydrate metabolic process	1329	234	209.13	0.00715
GO:0006470	protein dephosphorylation	134	24	21.09	0.00801
GO:0006635	fatty acid beta-oxidation	114	28	17.94	0.00928
GO:0009694	jasmonic acid metabolic process	76	24	11.96	0.00929
GO:0006612	protein targeting to membrane	164	38	25.81	0.00953
Gene Ontology: Plant GO Slim / Aspect: Biological Function
GO.ID	Term	Annotated	Significant	Expected	adj. P-Value
GO:0006810	transport	2286	460	360.36	2.2e-10
GO:0007165	signal transduction	1147	233	180.81	8.7e-06
GO:0009719	response to endogenous stimulus	1024	210	161.42	1.3e-05
GO:0009607	response to biotic stimulus	831	164	131	0.00085
GO:0006950	response to stress	2439	430	384.48	0.00250
GO:0009605	response to external stimulus	1198	228	188.85	0.00355
GO:0008219	cell death	257	57	40.51	0.00387
GO:0009628	response to abiotic stimulus	1877	334	295.89	0.00486
GO:0009056	catabolic process	1670	297	263.26	0.00829
Gene Families: MapMan Bins / Level: 3
ID	Term	Annotated	Significant	P-Value	Q-Value
27.3.11	RNA.regulation of transcription.C2H2 zinc finger family	35	13	0.00026149	0.0052298
29.3.4	protein.targeting.secretory pathway	95	29	0.000705922	0.00705921
20.2.1	stress.abiotic.heat	120	23	0.0043496	0.0210216
27.3.3	RNA.regulation of transcription.AP2/EREBP, APETALA2/Ethylene-responsive element binding protein family	22	10	0.00469779	0.0210216
29.5.11	protein.degradation.ubiquitin	345	93	0.00633658	0.0210216
27.3.35	RNA.regulation of transcription.bZIP transcription factor family	24	10	0.00643427	0.0210216
29.5.5	protein.degradation.serine protease	49	11	0.00783956	0.0210216
27.3.32	RNA.regulation of transcription.WRKY domain transcription factor family	23	15	0.00840864	0.0210216
29.5.3	protein.degradation.cysteine protease	44	11	0.0186778	0.0415062
20.1.7	stress.biotic.PR-proteins	24	11	0.0337521	0.0675042
