# Supplementary material for: Venus flytrap carnivorous lifestyle builds on herbivore defense strategies
Source: HighWire-hosted journal article supplement (doi:10.1101/gr.202200.115), 2016-05-04
Supplement: Supplemental_Table_S7.xlsx [file Supplemental_Table_S7.xlsx]

## Sheet: Secretome
Up regulated in Insect-stimulated glands
Down regulated in Insect-stimulated glands
Unigene	Representative Isoform	Synonym	Description	CRB Ortholog	Proteomics( Mechanics )	Proteomics( Insect )	Proteomics( Coronatin )
comp176127_c0	comp176127_c0_seq1	none	Purple Acid Phosphatase 27	none	yes	yes	yes
comp189219_c0	comp189219_c0_seq1	LYM2	LysM-containing Protein	AT2G17120.1	yes	yes	yes
comp198360_c0	comp198360_c0_seq2	none	S1/P1 Nuclease	none	yes	yes	yes
comp208790_c0	comp208790_c0_seq2	BGL2	Beta-Glucanase	AT3G57260.1	yes	yes	yes
comp214244_c0.0	comp214244_c0.0_seq1	SCPL49	Serine Carboxypeptidase 49	AT3G10410.1	yes	yes	yes
comp218887_c0	comp218887_c0_seq1	none	Aspartic peptidase	none	yes	yes	yes
comp219779_c0.0	comp219779_c0.0_seq2	none	Aspartic peptidase	AT5G22850.1	yes	yes	yes
comp224710_c1.0	comp224710_c1.0_seq1	RNS1	Ribonuclease T2	AT2G02990.1	yes	yes	yes
comp225923_c0.2	comp225923_c0.2_seq1	none	S1/P1 nuclease	none	yes	yes	yes
comp230357_c2	comp230357_c2_seq12	PRB1	Pathogenesis-related Protein	AT2G14580.1	yes	yes	yes
comp230828_c1.1	comp230828_c1.1_seq1	none	Peptide-N4-Asparagine Amidase A	AT3G14920.1	yes	yes	yes
comp231081_c0	comp231081_c0_seq1	SAG12	Cystein Peptidase C1A	AT5G45890.1	yes	yes	yes
comp232419_c2	comp232419_c2_seq5	none	Plant Peroxidase	none	yes	yes	yes
comp234411_c2.1	comp234411_c2.1_seq1	none	Plant Lipid Transfer Protein	none	yes	yes	yes
comp234852_c1	comp234852_c1_seq1	PR3	Chitinase Class I	AT3G12500.1	yes	yes	yes
comp210725_c1	comp210725_c1_seq2	PGIP1	Polygalacturonase Inhibiting Protein	AT5G06860.1	yes	yes	no
comp234314_c0.1	comp234314_c0.1_seq2	CHITIV	Chitinase Class IV	AT3G54420.1	yes	yes	no
comp130527_c0	comp130527_c0_seq1	none	Chitinase Class II	none	no	yes	yes
comp196613_c0	comp196613_c0_seq1	PDIL2-1	Thioredoxin	AT2G47470.1	no	yes	yes
comp199071_c0	comp199071_c0_seq1	PDIL1-2	Thioredoxin	AT1G77510.1	no	yes	yes
comp214993_c0	comp214993_c0_seq1	SCPL50	Serine Carboxypeptidase 50	AT1G15000.1	no	yes	yes
comp217413_c0.0	comp217413_c0.0_seq1	BIP2	Heat Shock Protein 70	AT5G42020.1	no	yes	yes
comp222061_c1	comp222061_c1_seq1	CYSC1	Cysteine Synthase K/M	AT3G61440.1	no	yes	yes
comp223674_c0	comp223674_c0_seq1	ALDH2B4	Aldehyde Dehydrogenase	AT3G48000.1	no	yes	yes
comp227369_c0	comp227369_c0_seq1	none	Serine Carboxypeptidase 40	none	no	yes	yes
comp230948_c0.1	comp230948_c0.1_seq1	none	Plant Peroxidase	none	no	yes	yes
comp231307_c3.0	comp231307_c3.0_seq1	none	Phospholipase C	AT1G13680.1	no	yes	yes
comp90077_c0	comp90077_c0_seq1	CRT1b	Calreticulin/Calnexin	AT1G09210.1	no	yes	yes
comp196659_c0	comp196659_c0_seq1	none	Saposin B	AT3G51730.1	no	yes	no
comp207862_c0	comp207862_c0_seq1	ATP3	ATPase, F1 Complex, Gamma Subunit	AT2G33040.1	no	yes	no
comp214477_c0	comp214477_c0_seq1	HSP90.7	Heat Shock Protein 90	AT4G24190.1	no	yes	no
comp217866_c0	comp217866_c0_seq1	PAP18	Purple Acid Phosphatase 18	AT3G20500.1	no	yes	no
comp220831_c0	comp220831_c0_seq3	none	Germin-like Protein	AT5G39120.1	no	yes	no
comp229872_c0	comp229872_c0_seq1	SAM1	S-Adenosylmethionine Synthetase 4	AT1G02500.1	no	yes	no
comp230061_c3.3	comp230061_c3.3_seq1	CYSB	Cystatin	AT3G12490.2	no	yes	no
comp231938_c1.2	comp231938_c1.2_seq2	none	Pyruvate Kinase	AT5G08570.1	no	yes	no
comp232378_c0	comp232378_c0_seq2	ACO3	Aconitase	AT2G05710.1	no	yes	no
comp233425_c2	comp233425_c2_seq1	none	Fructose-bisphosphate Aldolase	AT2G36460.1	no	yes	no
comp234650_c2.2	comp234650_c2.2_seq2	UGE2	UDP-Glucose 4-Epimerase	AT4G23920.1	no	yes	no
comp90017_c0.1	comp90017_c0.1_seq1	none	Phosphoglycerate mutase	AT1G09780.1	no	yes	no
comp228762_c0.0	comp228762_c0.0_seq26	none	Glycoside Hydrolase Family 18	none	no	no	yes
comp232264_c0	comp232264_c0_seq1	none	Flagellin-Sensitive 2	none	yes	no	yes
comp214654_c0	comp214654_c0_seq1	none	Fatty acid Desaturase	AT3G02630.1	no	yes	yes
comp231775_c6.0	comp231775_c6.0_seq21	ATB2	Aldo/keto Reductase	AT1G60710.1	no	yes	yes
comp234255_c7.1	comp234255_c7.1_seq2	LHCB3	Chlorophyll A-B Binding Protein	AT5G54270.1	no	yes	yes
comp219274_c0	comp219274_c0_seq1	none	Plant Peroxidase	AT5G05340.1	yes	yes	no
comp209740_c0	comp209740_c0_seq1	none	Plant Lipid Transfer Protein	none	yes	yes	yes
comp224439_c0	comp224439_c0_seq1	none	Nepenthesin-1	none	yes	yes	yes
comp206109_c0	comp206109_c0_seq1	ASP5	Aspartate/other Aminotransferase	AT4G31990.3	no	yes	no
comp217289_c0	comp217289_c0_seq2	none	Chaperonin Cpn60	AT3G13470.1	no	yes	no
comp222438_c0	comp222438_c0_seq1	LHCB2.4	Chlorophyll A-B Binding Protein	AT3G27690.1	no	yes	no
comp227997_c2	comp227997_c2_seq13	SHM4	Serine Hydroxymethyltransferase	AT4G13930.1	no	yes	no
comp228831_c3.0	comp228831_c3.0_seq1	2CPB	Alkyl Hydroperoxide Reductase	AT5G06290.1	no	yes	no
comp231346_c0.1	comp231346_c0.1_seq8	RCI3	Plant Peroxidase	AT1G05260.1	no	yes	no
comp232529_c0.1	comp232529_c0.1_seq1	none	GDP-mannose Dehydrogenase	AT5G15490.1	no	yes	no
