# Supplementary material for: Venus flytrap carnivorous lifestyle builds on herbivore defense strategies
Source: HighWire-hosted journal article supplement (doi:10.1101/gr.202200.115), 2016-05-04
Supplement: Supplemental_Table_S8.xlsx [file Supplemental_Table_S8.xlsx]

## Sheet: Kinases
Unigene	Representative Isoform	Synonym	Description	CRB Ortholog	RLK	Non-stimulated Trap (vs Petiole)	Insect-activated Trap (vs Trap)	Insect-activated Gland (vs Gland)
comp130020_c0	comp130020_c0_seq1	MAPKKK21	mitogen-activated protein kinase kinase kinase 21	AT4G36950	yes	no	yes	yes
comp183139_c0	comp183139_c0_seq1	NA	NOANNOT	NOREF	no	no	yes	yes
comp198933_c0	comp198933_c0_seq2	CIPK6, SIP3, SNRK3.14, ATCIPK6	SOS3-interacting protein 3	AT4G30960	yes	no	yes	yes
comp203618_c0	comp203618_c0_seq2	NA	Protein kinase superfamily protein	AT3G22750	yes	no	yes	yes
comp215021_c0	comp215021_c0_seq1	ATPERK10, PERK10	proline-rich extensin-like receptor kinase 10	AT1G26150	yes	no	yes	yes
comp221380_c1	comp221380_c1_seq1	NA	Leucine-rich repeat protein kinase family protein	AT2G26730	yes	no	yes	yes
comp223165_c5	comp223165_c5_seq2	NA	NOANNOT	NOREF	yes	no	yes	yes
comp223726_c0	comp223726_c0_seq1	NA	NOANNOT	NOREF	yes	no	yes	yes
comp224010_c11	comp224010_c11_seq1	NA	Leucine-rich receptor-like protein kinase family protein	AT1G72300	yes	no	yes	yes
comp224442_c5	comp224442_c5_seq2	NA	NOANNOT	NOREF	no	no	yes	yes
comp226371_c0	comp226371_c0_seq1	NA	NOANNOT	NOREF	yes	no	yes	yes
comp226371_c1	comp226371_c1_seq2	HT1	Protein kinase superfamily protein	AT1G62400	yes	no	yes	yes
comp226601_c0.0	comp226601_c0.0_seq7	NA	NOANNOT	NOREF	no	no	yes	yes
comp230357_c2	comp230357_c2_seq12	ATPRB1, PRB1	basic pathogenesis-related protein 1	AT2G14580	no	no	yes	yes
comp231232_c0	comp231232_c0_seq1	NA	Leucine-rich repeat protein kinase family protein	AT1G74360	yes	no	yes	yes
comp231708_c0	comp231708_c0_seq1	FLS2	Leucine-rich receptor-like protein kinase family protein	AT5G46330	yes	no	yes	yes
comp233772_c2	comp233772_c2_seq1	NA	Protein kinase superfamily protein	AT1G52540	yes	no	yes	yes
comp233834_c0.0	comp233834_c0.0_seq30	AFC1, AME2, FC1	FUS3-complementing gene 1	AT3G53570	yes	no	yes	yes
comp234213_c0.3	comp234213_c0.3_seq28	CPK4, ATCPK4	calcium-dependent protein kinase 4	AT4G09570	yes	no	yes	yes
comp139117_c0	comp139117_c0_seq2	NA	Protein kinase superfamily protein	AT3G44610	yes	yes	yes	yes
comp190144_c0	comp190144_c0_seq1	NA	NOANNOT	NOREF	yes	yes	yes	yes
comp206816_c0.0	comp206816_c0.0_seq1	NA	AGC (cAMP-dependent, cGMP-dependent and protein kinase C) kinase family protein	AT4G13000	yes	yes	yes	yes
comp208866_c0	comp208866_c0_seq2	NA	Protein kinase superfamily protein	AT1G20650	yes	yes	yes	yes
comp215732_c1.0	comp215732_c1.0_seq2	NA	Protein kinase superfamily protein	AT4G34500	yes	yes	yes	yes
comp217558_c0	comp217558_c0_seq2	NA	Protein kinase superfamily protein	AT5G58950	yes	yes	yes	yes
comp218738_c0	comp218738_c0_seq1	NA	Leucine-rich repeat protein kinase family protein	AT5G62710	yes	yes	yes	yes
comp223324_c1	comp223324_c1_seq1	SRF8	STRUBBELIG-receptor family 8	AT4G22130	yes	yes	yes	yes
comp223726_c1.0	comp223726_c1.0_seq1	ATCDPK1, CPK10, CDPK1, AtCPK10	calcium-dependent protein kinase 1	AT1G18890	yes	yes	yes	yes
comp226389_c5.0	comp226389_c5.0_seq2	NA	Leucine-rich repeat protein kinase family protein	AT2G41820	yes	yes	yes	yes
comp226957_c0.0	comp226957_c0.0_seq1	NA	Protein kinase superfamily protein	AT5G56890	yes	yes	yes	yes
comp227236_c2.0	comp227236_c2.0_seq5	SRF3	STRUBBELIG-receptor family 3	AT4G03390	yes	yes	yes	yes
comp227270_c2.0	comp227270_c2.0_seq4	NA	protein kinase family protein	AT5G26150	yes	yes	yes	yes
comp227763_c0	comp227763_c0_seq1	NA	U-box domain-containing protein kinase family protein	AT2G45910	yes	yes	yes	yes
comp227786_c1	comp227786_c1_seq3	NA	Leucine-rich receptor-like protein kinase family protein	AT4G36180	yes	yes	yes	yes
comp228879_c1.1	comp228879_c1.1_seq4	NA	NOANNOT	NOREF	yes	yes	yes	yes
comp229128_c1	comp229128_c1_seq2	BAM1	Leucine-rich receptor-like protein kinase family protein	AT5G65700	yes	yes	yes	yes
comp231673_c1.0	comp231673_c1.0_seq1	NA	Protein kinase superfamily protein	AT4G32000	yes	yes	yes	yes
comp231786_c0.0	comp231786_c0.0_seq1	NA	Mitogen activated protein kinase kinase kinase-related	AT3G58640	yes	yes	yes	yes
comp231944_c10.0	comp231944_c10.0_seq2	ATNEK2, NEK2	NIMA-related kinase 2	AT3G04810	yes	yes	yes	yes
comp233456_c0.0	comp233456_c0.0_seq1	FU	Protein kinase family protein with ARM repeat domain	AT1G50240	yes	yes	yes	yes
comp234216_c1.2	comp234216_c1.2_seq2	ATPK19, ATS6K2, S6K2, ATPK2	serine/threonine protein kinase 2	AT3G08720	yes	yes	yes	yes
comp234621_c0.0	comp234621_c0.0_seq1	LRR XI-23, RLK7	Leucine-rich receptor-like protein kinase family protein	AT1G09970	yes	yes	yes	yes
comp234650_c2.3	comp234650_c2.3_seq20	NA	ACT-like protein tyrosine kinase family protein	AT4G38470	yes	yes	yes	yes
comp234666_c0.1	comp234666_c0.1_seq1	NA	Leucine-rich receptor-like protein kinase family protein	AT5G56040	yes	yes	yes	yes
comp234779_c1	comp234779_c1_seq1	CCR3, ATCRR3	CRINKLY4 related 3	AT3G55950	yes	yes	yes	yes
comp90082_c0	comp90082_c0_seq1	NA	ABC1 family protein	AT5G24810	yes	yes	yes	yes
comp139560_c0	comp139560_c0_seq1	NA	NOANNOT	NOREF	yes	no	no	yes
comp165473_c1	comp165473_c1_seq1	NA	NOANNOT	NOREF	yes	no	no	yes
comp200482_c0	comp200482_c0_seq1	NA	NOANNOT	NOREF	yes	no	no	yes
comp201770_c0	comp201770_c0_seq1	CRLK2, AtCRLK2	Protein kinase superfamily protein	AT5G15730	yes	no	no	yes
comp208937_c0	comp208937_c0_seq1	NA	Protein kinase superfamily protein	AT3G59110	yes	no	no	yes
comp216735_c0	comp216735_c0_seq1	ATMPK4, MPK4	MAP kinase 4	AT4G01370	yes	no	no	yes
comp218967_c0	comp218967_c0_seq1	NA	NOANNOT	NOREF	yes	no	no	yes
comp220068_c0.0	comp220068_c0.0_seq1	CERK1, LYSM RLK1	chitin elicitor receptor kinase 1	AT3G21630	yes	no	no	yes
comp221792_c0	comp221792_c0_seq12	CPK17	calcium-dependent protein kinase 17	AT5G12180	yes	no	no	yes
comp224010_c3	comp224010_c3_seq1	NA	NOANNOT	NOREF	yes	no	no	yes
comp227484_c3	comp227484_c3_seq2	NA	Protein kinase superfamily protein	AT4G31170	yes	no	no	yes
comp229280_c1.2	comp229280_c1.2_seq9	ATMPK19, MPK19	MAP kinase 19	AT3G14720	yes	no	no	yes
comp229315_c0.0	comp229315_c0.0_seq2	NA	Leucine-rich repeat protein kinase family protein	AT5G49760	yes	no	no	yes
comp229557_c1.0	comp229557_c1.0_seq5	ATMTK, MTK	S-methyl-5-thioribose kinase	AT1G49820	no	no	no	yes
comp229614_c0.0	comp229614_c0.0_seq29	NA	Protein kinase superfamily protein	AT1G11050	yes	no	no	yes
comp229666_c1.1	comp229666_c1.1_seq1	NA	S-locus lectin protein kinase family protein	AT2G19130	yes	no	no	yes
comp231143_c2	comp231143_c2_seq5	IRE1-1	inositol requiring 1-1	AT5G24360	yes	no	no	yes
comp232010_c1	comp232010_c1_seq21	NA	Peroxidase superfamily protein	AT5G40150	no	no	no	yes
comp232127_c0.2	comp232127_c0.2_seq8	NA	PAS domain-containing protein tyrosine kinase family protein	AT1G67890	yes	no	no	yes
comp232167_c0	comp232167_c0_seq5	NA	Protein kinase family protein	AT3G13670	yes	no	no	yes
comp232232_c2	comp232232_c2_seq6	WNK5, ZIK1, ATWNK5	with no lysine (K) kinase 5	AT3G51630	yes	no	no	yes
comp234149_c0.1	comp234149_c0.1_seq6	NA	Protein kinase superfamily protein	AT5G47070	yes	no	no	yes
comp133027_c0	comp133027_c0_seq1	GSK1, ATGSK1, ATSK22, SK22, BIL2, ATSK2-3	GSK3/SHAGGY-like protein kinase 1	AT1G06390	no	yes	no	yes
comp170162_c0	comp170162_c0_seq1	NA	Protein kinase superfamily protein	AT3G59350	yes	yes	no	yes
comp187126_c0	comp187126_c0_seq1	TMK1	transmembrane kinase 1	AT1G66150	yes	yes	no	yes
comp187127_c0	comp187127_c0_seq1	NA	protein kinase family protein / C-type lectin domain-containing protein	AT1G52310	yes	yes	no	yes
comp187426_c0	comp187426_c0_seq1	PID, ABR	Protein kinase superfamily protein	AT2G34650	yes	yes	no	yes
comp188209_c0.0	comp188209_c0.0_seq2	SOS2, SNRK3.11, CIPK24, ATSOS2	Protein kinase superfamily protein	AT5G35410	yes	yes	no	yes
comp189180_c0	comp189180_c0_seq1	ASKdZeta, ATSK23, BIL1, ATSK2-2, SKdZeta	SHAGGY-related protein kinase dZeta	AT2G30980	yes	yes	no	yes
comp190689_c0	comp190689_c0_seq1	NA	NOANNOT	NOREF	yes	yes	no	yes
comp191762_c1	comp191762_c1_seq2	APK2B	protein kinase 2B	AT2G02800	yes	yes	no	yes
comp197290_c0	comp197290_c0_seq1	NA	NOANNOT	NOREF	yes	yes	no	yes
comp198164_c1	comp198164_c1_seq1	APK1A	Protein kinase superfamily protein	AT1G07570	yes	yes	no	yes
comp198233_c0	comp198233_c0_seq3	NA	Protein kinase superfamily protein	AT1G78290	yes	yes	no	yes
comp200124_c1	comp200124_c1_seq1	CIPK23, SnRK3.23, ATCIPK23, LKS1	CBL-interacting protein kinase 23	AT1G30270	yes	yes	no	yes
comp200904_c1	comp200904_c1_seq1	NA	Protein kinase superfamily protein	AT5G03640	yes	yes	no	yes
comp202999_c0	comp202999_c0_seq1	ATPK3, PK3	serine/threonine protein kinase 3	AT5G08160	yes	yes	no	yes
comp208353_c2.0	comp208353_c2.0_seq1	NA	Protein kinase superfamily protein	AT1G28390	yes	yes	no	yes
comp210387_c1	comp210387_c1_seq1	MAPKKK14	mitogen-activated protein kinase kinase kinase 14	AT2G30040	yes	yes	no	yes
comp211302_c0	comp211302_c0_seq1	TMKL1	transmembrane kinase-like 1	AT3G24660	yes	yes	no	yes
comp211954_c0	comp211954_c0_seq1	ALE2	Protein kinase superfamily protein	AT2G20300	no	yes	no	yes
comp211954_c1	comp211954_c1_seq1	ALE2	Protein kinase superfamily protein	AT2G20300	no	yes	no	yes
comp213375_c1	comp213375_c1_seq1	NA	NOANNOT	NOREF	yes	yes	no	yes
comp213600_c0	comp213600_c0_seq1	D6PKL2, PK5	D6 protein kinase like 2	AT5G47750	yes	yes	no	yes
comp215668_c0.0	comp215668_c0.0_seq3	ATNEK6, NEK6, IBO1	NIMA (never in mitosis, gene A)-related 6	AT3G44200	yes	yes	no	yes
comp216041_c0	comp216041_c0_seq1	NA	Protein kinase superfamily protein	AT3G62220	yes	yes	no	yes
comp216185_c0.0	comp216185_c0.0_seq1	PHS1	dual specificity protein phosphatase family protein	AT5G23720	no	yes	no	yes
comp216496_c2	comp216496_c2_seq1	NA	NOANNOT	NOREF	yes	yes	no	yes
comp217115_c0	comp217115_c0_seq1	NA	Leucine-rich repeat transmembrane protein kinase family protein	AT5G51350	yes	yes	no	yes
comp217292_c0.1	comp217292_c0.1_seq6	NA	Leucine-rich repeat protein kinase family protein	AT5G63930	yes	yes	no	yes
comp217784_c0	comp217784_c0_seq2	CPK7	calmodulin-domain protein kinase 7	AT5G12480	yes	yes	no	yes
comp220689_c0	comp220689_c0_seq1	ATMPK1, MPK1	mitogen-activated protein kinase 1	AT1G10210	yes	yes	no	yes
comp220970_c1	comp220970_c1_seq1	NA	NOANNOT	NOREF	yes	yes	no	yes
comp221022_c0	comp221022_c0_seq2	MTO3, SAMS3, MAT4	S-adenosylmethionine synthetase family protein	AT3G17390	no	yes	no	yes
comp221606_c0	comp221606_c0_seq2	ATPI4K GAMMA 4, UBDK GAMMA 4, PI4K GAMMA 4	phosphoinositide 4-kinase gamma 4	AT2G46500	no	yes	no	yes
comp222381_c1	comp222381_c1_seq1	AP4.3A	protein kinase family protein	AT2G32800	yes	yes	no	yes
comp223211_c0	comp223211_c0_seq6	NA	NOANNOT	NOREF	yes	yes	no	yes
comp223495_c2.2	comp223495_c2.2_seq50	CPK20	calcium-dependent protein kinase 20	AT2G38910	yes	yes	no	yes
comp223731_c1.3	comp223731_c1.3_seq25	ATPERK1, PERK1	proline extensin-like receptor kinase 1	AT3G24550	yes	yes	no	yes
comp223964_c0.0	comp223964_c0.0_seq23	NA	Protein kinase superfamily protein	AT1G45160	yes	yes	no	yes
comp224163_c3	comp224163_c3_seq1	CIPK6, SIP3, SNRK3.14, ATCIPK6	SOS3-interacting protein 3	AT4G30960	yes	yes	no	yes
comp224695_c5	comp224695_c5_seq6	VH1, BRL2	BRI1-like 2	AT2G01950	yes	yes	no	yes
comp224978_c0	comp224978_c0_seq1	NAK	Protein kinase superfamily protein	AT5G02290	yes	yes	no	yes
comp225200_c3.1	comp225200_c3.1_seq2	NA	protein kinase family protein / peptidoglycan-binding LysM domain-containing protein	AT1G51940	yes	yes	no	yes
comp225302_c4	comp225302_c4_seq1	NA	Leucine-rich repeat protein kinase family protein	AT2G24230	yes	yes	no	yes
comp226139_c2.0	comp226139_c2.0_seq1	NA	Leucine-rich repeat protein kinase family protein	AT2G16250	yes	yes	no	yes
comp226176_c3.0	comp226176_c3.0_seq2	NA	Leucine-rich repeat protein kinase family protein	AT5G43020	yes	yes	no	yes
comp226183_c0.0	comp226183_c0.0_seq4	PERK4	roline-rich extensin-like receptor kinase 4	AT2G18470	yes	yes	no	yes
comp226522_c0.0	comp226522_c0.0_seq13	NA	S-locus lectin protein kinase family protein	AT4G27290	yes	yes	no	yes
comp226542_c0.3	comp226542_c0.3_seq3	FEI1	Leucine-rich repeat protein kinase family protein	AT1G31420	yes	yes	no	yes
comp226702_c0.1	comp226702_c0.1_seq2	NA	Protein kinase superfamily protein	AT5G18610	yes	yes	no	yes
comp227182_c0	comp227182_c0_seq2	NA	Leucine-rich repeat protein kinase family protein	AT1G14390	no	yes	no	yes
comp227182_c1	comp227182_c1_seq1	NA	NOANNOT	NOREF	yes	yes	no	yes
comp227858_c0	comp227858_c0_seq1	NA	Protein kinase superfamily protein	AT4G02630	yes	yes	no	yes
comp228707_c0.0	comp228707_c0.0_seq5	NA	Protein kinase superfamily protein	AT1G54610	yes	yes	no	yes
comp228785_c0.0	comp228785_c0.0_seq2	NA	Protein kinase superfamily protein	AT5G37790	yes	yes	no	yes
comp228905_c1.1	comp228905_c1.1_seq5	NA	NOANNOT	NOREF	yes	yes	no	yes
comp228934_c1.2	comp228934_c1.2_seq15	WNK1, ZIK4, ATWNK1	with no lysine (K) kinase 1	AT3G04910	yes	yes	no	yes
comp229076_c6.0	comp229076_c6.0_seq1	NA	Serine/threonine-protein kinase Rio1	AT5G37350	no	yes	no	yes
comp229212_c3	comp229212_c3_seq1	ATCRK3, CRK3	CDPK-related kinase 3	AT2G46700	yes	yes	no	yes
comp229257_c0.0	comp229257_c0.0_seq1	SRPK4	ser/arg-rich protein kinase 4	AT3G53030	yes	yes	no	yes
comp229526_c3	comp229526_c3_seq1	NA	NOANNOT	NOREF	yes	yes	no	yes
comp229526_c4	comp229526_c4_seq1	NA	NOANNOT	NOREF	yes	yes	no	yes
comp229606_c1	comp229606_c1_seq2	CRK1, ATCRK1, ATCBK3	CDPK-related kinase 1	AT2G41140	yes	yes	no	yes
comp230300_c0.1	comp230300_c0.1_seq2	NA	Protein kinase protein with adenine nucleotide alpha hydrolases-like domain	AT1G77280	yes	yes	no	yes
comp230401_c0	comp230401_c0_seq11	NCRK	Protein kinase superfamily protein	AT2G28250	yes	yes	no	yes
comp230414_c0	comp230414_c0_seq1	CRK25	cysteine-rich RLK (RECEPTOR-like protein kinase) 25	AT4G05200	yes	yes	no	yes
comp230566_c0.0	comp230566_c0.0_seq4	NA	Protein kinase superfamily protein	AT5G50180	yes	yes	no	yes
comp230802_c1.0	comp230802_c1.0_seq2	SD2-5	S-domain-2 5	AT4G32300	yes	yes	no	yes
comp230814_c1	comp230814_c1_seq2	NA	Protein kinase superfamily protein	AT1G16670	yes	yes	no	yes
comp231129_c0.2	comp231129_c0.2_seq2	NA	Protein kinase superfamily protein	AT5G07620	yes	yes	no	yes
comp231822_c0	comp231822_c0_seq3	NA	ATP binding	AT2G20635	yes	yes	no	yes
comp232063_c0	comp232063_c0_seq2	ANP3, MAPKKK12, NP3	NPK1-related protein kinase 3	AT3G06030	yes	yes	no	yes
comp232791_c0.2	comp232791_c0.2_seq34	NA	transferases, transferring acyl groups	AT4G17910	yes	yes	no	yes
comp232818_c0	comp232818_c0_seq1	PPCK1, ATPPCK1	phosphoenolpyruvate carboxylase kinase 1	AT1G08650	yes	yes	no	yes
comp234134_c0.0	comp234134_c0.0_seq9	NA	Leucine-rich repeat protein kinase family protein	AT4G37250	yes	yes	no	yes
comp234134_c0.5	comp234134_c0.5_seq1	NA	Leucine-rich repeat protein kinase family protein	AT4G37250	yes	yes	no	yes
comp234198_c0.0	comp234198_c0.0_seq4	FER	Malectin/receptor-like protein kinase family protein	AT3G51550	yes	yes	no	yes
comp234480_c3.0	comp234480_c3.0_seq1	NA	NOANNOT	NOREF	yes	yes	no	yes
comp241944_c0	comp241944_c0_seq1	NA	CDKF	AT4G28980	yes	yes	no	yes
comp90358_c0.0	comp90358_c0.0_seq1	SRF7	STRUBBELIG-receptor family 7	AT3G14350	yes	yes	no	yes
comp94836_c0	comp94836_c0_seq1	KEG	protein kinases	AT5G13530	yes	yes	no	yes
comp234058_c1.0	comp234058_c1.0_seq7	NA	Protein kinase superfamily protein	AT5G18910	no	no	yes	no
comp234880_c2.2	comp234880_c2.2_seq4	NA	NOANNOT	NOREF	yes	no	yes	no
comp196973_c0	comp196973_c0_seq1	SOBIR1, EVR	Leucine-rich repeat protein kinase family protein	AT2G31880	yes	yes	yes	no
comp198625_c0	comp198625_c0_seq1	NA	NOANNOT	NOREF	yes	yes	yes	no
comp200904_c0.0	comp200904_c0.0_seq1	KIPK	KCBP-interacting protein kinase	AT3G52890	yes	yes	yes	no
comp211410_c1	comp211410_c1_seq1	NA	NOANNOT	NOREF	yes	yes	yes	no
comp214369_c1	comp214369_c1_seq1	NA	Protein kinase superfamily protein	AT3G09830	yes	yes	yes	no
comp215892_c0	comp215892_c0_seq1	PID2	AGC (cAMP-dependent, cGMP-dependent and protein kinase C) kinase family protein	AT2G26700	yes	yes	yes	no
comp216552_c0	comp216552_c0_seq1	NA	Leucine-rich repeat protein kinase family protein	AT5G63710	yes	yes	yes	no
comp222717_c4.0	comp222717_c4.0_seq5	CPK16	calcium-dependent protein kinase 16	AT2G17890	yes	yes	yes	no
comp224107_c1.0	comp224107_c1.0_seq2	NA	Leucine-rich repeat receptor-like protein kinase family protein	AT4G08850	yes	yes	yes	no
comp224284_c0.10	comp224284_c0.10_seq11	CIPK3	CBL-interacting protein kinase 3	AT2G26980	yes	yes	yes	no
comp226059_c0	comp226059_c0_seq1	NA	Protein kinase superfamily protein	AT2G23450	yes	yes	yes	no
comp226655_c6	comp226655_c6_seq1	NA	NOANNOT	NOREF	yes	yes	yes	no
comp228335_c2	comp228335_c2_seq1	NA	NOANNOT	NOREF	yes	yes	yes	no
comp228708_c0.0	comp228708_c0.0_seq1	NIK1	NSP-interacting kinase 1	AT5G16000	yes	yes	yes	no
comp230124_c2	comp230124_c2_seq1	NA	Leucine-rich receptor-like protein kinase family protein	AT3G28040	yes	yes	yes	no
comp230889_c0.1	comp230889_c0.1_seq5	IRE1A, ATIRE1-2, IRE1-2	Endoribonuclease/protein kinase IRE1-like	AT2G17520	yes	yes	yes	no
comp232235_c0	comp232235_c0_seq2	NA	NOANNOT	NOREF	yes	yes	yes	no
comp232235_c1	comp232235_c1_seq1	NA	NOANNOT	NOREF	yes	yes	yes	no
comp232598_c0.0	comp232598_c0.0_seq1	NA	NOANNOT	NOREF	yes	yes	yes	no
comp233143_c1.1	comp233143_c1.1_seq14	CPK9	calmodulin-domain protein kinase 9	AT3G20410	yes	yes	yes	no
comp134808_c0	comp134808_c0_seq1	NA	CDKB2	AT1G20930	yes	yes	no	no
comp158021_c0	comp158021_c0_seq1	ATNEK5, NEK5	NIMA-related kinase 5	AT3G20860	yes	yes	no	no
comp164600_c0	comp164600_c0_seq1	CK1, CKL1	casein kinase 1	AT4G26100	yes	yes	no	no
comp171861_c0	comp171861_c0_seq1	NA	Protein kinase superfamily protein	AT1G54610	yes	yes	no	no
comp171861_c1	comp171861_c0_seq1	NA	Protein kinase superfamily protein	AT1G54610	no	yes	no	no
comp171937_c0	comp171937_c0_seq1	ACR4, CR4	crinkly4	AT3G59420	yes	yes	no	no
comp173507_c1	comp173507_c1_seq1	NA	Protein kinase superfamily protein	AT5G42440	yes	yes	no	no
comp184938_c0	comp184938_c0_seq1	BAM3	Leucine-rich receptor-like protein kinase family protein	AT4G20270	yes	yes	no	no
comp187721_c0	comp187721_c0_seq1	NA	NOANNOT	NOREF	yes	yes	no	no
comp188723_c0	comp188723_c0_seq1	IBR3	acyl-CoA dehydrogenase-related	AT3G06810	no	yes	no	no
comp188977_c0	comp188977_c0_seq1	NA	Protein kinase superfamily protein	AT1G74320	no	yes	no	no
comp189173_c0	comp189173_c0_seq1	TMK1	transmembrane kinase 1	AT1G66150	yes	yes	no	no
comp190982_c0	comp190982_c0_seq1	NA	NOANNOT	NOREF	yes	yes	no	no
comp192952_c0.0	comp192952_c0.0_seq1	NA	NOANNOT	NOREF	yes	yes	no	no
comp198304_c0.0	comp198304_c0.0_seq1	SIK1	Protein kinase superfamily protein	AT1G69220	yes	yes	no	no
comp199839_c0	comp199839_c0_seq1	NA	Leucine-rich repeat protein kinase family protein	AT3G28450	yes	yes	no	no
comp200140_c0	comp200140_c0_seq1	NA	Protein kinase family protein	AT3G13670	yes	yes	no	no
comp202568_c1.0	comp202568_c1.0_seq1	NA	Protein kinase superfamily protein	AT3G17850	yes	yes	no	no
comp205997_c1	comp205997_c1_seq1	PDK1, ATPDK1	3'-phosphoinositide-dependent protein kinase 1	AT5G04510	yes	yes	no	no
comp207669_c0	comp207669_c0_seq1	NA	NOANNOT	NOREF	yes	yes	no	no
comp207669_c1	comp207669_c1_seq1	ATSK13, SK13	shaggy-like kinase 13	AT5G14640	yes	yes	no	no
comp208829_c0	comp208829_c0_seq1	NIK3	NSP-interacting kinase 3	AT1G60800	yes	yes	no	no
comp210873_c3	comp210873_c3_seq1	BAM3	Leucine-rich receptor-like protein kinase family protein	AT4G20270	yes	yes	no	no
comp211410_c0	comp211410_c0_seq1	NA	NOANNOT	NOREF	yes	yes	no	no
comp211415_c0	comp211415_c0_seq2	CKI1, CKL11	casein kinase I	AT4G14340	yes	yes	no	no
comp211990_c2	comp211990_c2_seq1	NA	Concanavalin A-like lectin protein kinase family protein	AT3G53380	yes	yes	no	no
comp214176_c0	comp214176_c0_seq1	NA	Concanavalin A-like lectin protein kinase family protein	AT3G55550	yes	yes	no	no
comp214227_c0	comp214227_c0_seq1	ATPI4K GAMMA 4, UBDK GAMMA 4, PI4K GAMMA 4	phosphoinositide 4-kinase gamma 4	AT2G46500	no	yes	no	no
comp215772_c0	comp215772_c0_seq1	AKIN10, KIN10	SNF1 kinase homolog 10	AT3G01090	yes	yes	no	no
comp216180_c0	comp216180_c0_seq1	NA	NOANNOT	NOREF	yes	yes	no	no
comp216563_c0	comp216563_c0_seq1	NA	Protein kinase superfamily protein	AT5G51800	no	yes	no	no
comp217224_c0	comp217224_c0_seq1	CKI1, CKL11	casein kinase I	AT4G14340	yes	yes	no	no
comp217655_c0.0	comp217655_c0.0_seq1	ATMKK2, MKK2, MK1	MAP kinase kinase 2	AT4G29810	yes	yes	no	no
comp217779_c0	comp217779_c0_seq2	AtAUR1, AUR1	ataurora1	AT4G32830	yes	yes	no	no
comp217875_c0.0	comp217875_c0.0_seq1	NA	U-box domain-containing protein kinase family protein	AT2G45910	yes	yes	no	no
comp218486_c1	comp218486_c1_seq2	ATSK13, SK13	shaggy-like kinase 13	AT5G14640	yes	yes	no	no
comp218803_c0.0	comp218803_c0.0_seq1	PI-4KBETA1, PI4KBETA1	phosphatidylinositol 4-OH kinase beta1	AT5G64070	no	yes	no	no
comp219046_c1.0	comp219046_c1.0_seq1	WNK1, ZIK4, ATWNK1	with no lysine (K) kinase 1	AT3G04910	yes	yes	no	no
comp219089_c0	comp219089_c0_seq2	NA	NOANNOT	NOREF	yes	yes	no	no
comp219719_c0.0	comp219719_c0.0_seq2	NA	NOANNOT	NOREF	yes	yes	no	no
comp220284_c0	comp220284_c0_seq1	NA	Concanavalin A-like lectin protein kinase family protein	AT5G10530	yes	yes	no	no
comp220563_c0	comp220563_c0_seq1	NA	NOANNOT	NOREF	no	yes	no	no
comp220875_c0.0	comp220875_c0.0_seq1	NA	Concanavalin A-like lectin protein kinase family protein	AT5G06740	yes	yes	no	no
comp221302_c1	comp221302_c1_seq1	NA	Leucine-rich repeat protein kinase family protein	AT5G35390	yes	yes	no	no
comp221632_c0	comp221632_c0_seq1	NA	Leucine-rich repeat protein kinase family protein	AT2G27060	yes	yes	no	no
comp221651_c0	comp221651_c0_seq1	NA	leucine-rich repeat transmembrane protein kinase family protein	AT1G68400	yes	yes	no	no
comp222319_c0	comp222319_c0_seq1	NA	AGC (cAMP-dependent, cGMP-dependent and protein kinase C) kinase family protein	AT4G14350	yes	yes	no	no
comp222319_c2	comp222319_c2_seq1	NA	AGC (cAMP-dependent, cGMP-dependent and protein kinase C) kinase family protein	AT2G20470	yes	yes	no	no
comp222515_c0	comp222515_c0_seq2	NA	NOANNOT	NOREF	yes	yes	no	no
comp222704_c0	comp222704_c0_seq1	NA	Leucine-rich repeat protein kinase family protein	AT3G57830	yes	yes	no	no
comp222936_c0	comp222936_c0_seq5	NA	Protein kinase superfamily protein	AT2G40980	no	yes	no	no
comp223365_c0.0	comp223365_c0.0_seq2	ATPI4K ALPHA	Phosphatidylinositol 3- and 4-kinase family protein	AT1G49340	no	yes	no	no
comp223907_c7.1	comp223907_c7.1_seq2	BAK1	BRI1-associated receptor kinase	AT4G33430	yes	yes	no	no
comp223924_c0	comp223324_c0_seq4	OST1, SNRK2-6, SRK2E, SNRK2.6, P44, ATOST1	Protein kinase superfamily protein	AT4G33950	no	yes	no	no
comp223953_c0	comp223953_c0_seq1	NA	Protein kinase family protein	AT5G02070	yes	yes	no	no
comp224078_c0.0	comp224078_c0.0_seq1	NA	Integrin-linked protein kinase family	AT2G43850	yes	yes	no	no
comp224103_c2	comp224103_c2_seq1	NA	NOANNOT	NOREF	yes	yes	no	no
comp225029_c0.1	comp225029_c0.1_seq1	ATABC1, ATATH10, ABC1	ABC transporter 1	AT4G01660	yes	yes	no	no
comp225562_c0	comp225562_c0_seq1	NA	NOANNOT	NOREF	yes	yes	no	no
comp225796_c0.1	comp225796_c0.1_seq1	ATMPK6, MPK6, MAPK6, ATMAPK6	MAP kinase 6	AT2G43790	yes	yes	no	no
comp225799_c2.1	comp225799_c2.1_seq1	NA	Protein kinase superfamily protein	AT2G17530	yes	yes	no	no
comp225879_c0.0	comp225879_c0.0_seq1	NA	Leucine-rich repeat receptor-like protein kinase family protein	AT3G24240	yes	yes	no	no
comp225879_c0.2	comp225879_c0.2_seq1	NA	Leucine-rich repeat transmembrane protein kinase family protein	AT4G28650	yes	yes	no	no
comp226092_c0.0	comp226092_c0.0_seq6	NA	PB1 domain-containing protein tyrosine kinase	AT1G04700	yes	yes	no	no
comp226143_c0.0	comp226143_c0.0_seq1	THE1	protein kinase family protein	AT5G54380	yes	yes	no	no
comp226176_c0	comp226176_c0_seq1	NA	NOANNOT	NOREF	yes	yes	no	no
comp226423_c1	comp226423_c1_seq1	NA	NOANNOT	NOREF	no	yes	no	no
comp226655_c0	comp226655_c0_seq1	NA	NOANNOT	NOREF	yes	yes	no	no
comp226655_c12	comp226655_c12_seq1	NA	NOANNOT	NOREF	yes	yes	no	no
comp226929_c0.1	comp226929_c0.1_seq1	BIR1	BAK1-interacting receptor-like kinase 1	AT5G48380	yes	yes	no	no
comp226999_c0.2	comp226999_c0.2_seq1	NA	Protein kinase superfamily protein	AT5G57670	yes	yes	no	no
comp227575_c2.1	comp227575_c2.1_seq2	NA	Protein kinase superfamily protein	AT3G59350	yes	yes	no	no
comp229254_c0	comp229254_c0_seq2	HSL1	HAESA-like 1	AT1G28440	yes	yes	no	no
comp229477_c0.0	comp229477_c0.0_seq1	NA	NOANNOT	NOREF	yes	yes	no	no
comp229494_c0.2	comp229494_c0.2_seq7	NA	NOANNOT	NOREF	no	yes	no	no
comp229787_c0	comp229787_c0_seq1	NA	Leucine-rich repeat protein kinase family protein	AT4G23740	yes	yes	no	no
comp230257_c0	comp230257_c0_seq2	emb1187	Protein kinase superfamily protein	AT2G26830	no	yes	no	no
comp230272_c5.1	comp230272_c5.1_seq1	NA	NOANNOT	NOREF	yes	yes	no	no
comp230472_c1.1	comp230472_c1.1_seq1	NA	Leucine-rich repeat protein kinase family protein	AT3G56370	yes	yes	no	no
comp230807_c3	comp230807_c3_seq1	SERK1, ATSERK1	somatic embryogenesis receptor-like kinase 1	AT1G71830	yes	yes	no	no
comp230864_c4	comp230864_c4_seq1	NA	NOANNOT	NOREF	yes	yes	no	no
comp230871_c0.0	comp230871_c0.0_seq2	ATSK12	Protein kinase superfamily protein	AT3G05840	yes	yes	no	no
comp231436_c0.0	comp231436_c0.0_seq3	NA	Leucine-rich repeat protein kinase family protein	AT5G58300	yes	yes	no	no
comp232095_c0.0	comp232095_c0.0_seq1	NA	Protein kinase superfamily protein	AT2G32850	yes	yes	no	no
comp232220_c0.0	comp232220_c0.0_seq2	NA	Leucine-rich repeat protein kinase family protein	AT3G23750	yes	yes	no	no
comp233083_c1.0	comp233083_c1.0_seq3	CPK29	calcium-dependent protein kinase 29	AT1G76040	yes	yes	no	no
comp233178_c0.0	comp233178_c0.0_seq5	NA	Leucine-rich repeat protein kinase family protein	AT2G26730	yes	yes	no	no
comp233472_c0.0	comp233472_c0.0_seq21	NA	Protein kinase protein with adenine nucleotide alpha hydrolases-like domain	AT2G16750	yes	yes	no	no
comp233982_c2.1	comp233982_c2.1_seq1	PEPR1, ATPEPR1	PEP1 receptor 1	AT1G73080	yes	yes	no	no
comp234145_c1.0	comp234145_c1.0_seq2	HT1	Protein kinase superfamily protein	AT1G62400	yes	yes	no	no
comp234188_c1.0	comp234188_c1.0_seq1	PBS1	Protein kinase superfamily protein	AT5G13160	yes	yes	no	no
comp234459_c0.1	comp234459_c0.1_seq1	HERK1	hercules receptor kinase 1	AT3G46290	yes	yes	no	no
comp234540_c0	comp234540_c0_seq4	NA	Protein kinase superfamily protein	AT1G53050	yes	yes	no	no
comp234580_c0.0	comp234580_c0.0_seq27	CTR1, SIS1, AtCTR1	Protein kinase superfamily protein	AT5G03730	yes	yes	no	no
comp80710_c0	comp80710_c0_seq1	NA	NOANNOT	NOREF	no	yes	no	no
comp89962_c0	comp89962_c0_seq1	NA	NOANNOT	NOREF	yes	yes	no	no
