# Supplementary material for: Venus flytrap carnivorous lifestyle builds on herbivore defense strategies
Source: HighWire-hosted journal article supplement (doi:10.1101/gr.202200.115), 2016-05-04
Supplement: Supplemental_Table_S9.xlsx [file Supplemental_Table_S9.xlsx]

## Sheet: Enrichment Insect-activated Trap
Gene Ontology: Generic GO / Aspect: Biological Function
GO.ID	Term	Annotated	Significant	Expected	adj. P-Value
GO:0009611	response to wounding	171	42	13.33	1.7e-11
GO:0010200	response to chitin	149	35	11.61	2.3e-09
GO:0030968	endoplasmic reticulum unfolded protein r...	78	22	6.08	6.9e-08
GO:0055114	oxidation-reduction process	1580	162	123.15	1.5e-07
GO:0046686	response to cadmium ion	490	71	38.19	2.1e-07
GO:0052542	defense response by callose deposition	38	11	2.96	3.3e-07
GO:0034976	response to endoplasmic reticulum stress	165	44	12.86	4.2e-07
GO:0009738	abscisic acid-activated signaling pathwa...	130	29	10.13	4.5e-07
GO:0009414	response to water deprivation	211	38	16.45	7.2e-07
GO:0009695	jasmonic acid biosynthetic process	63	18	4.91	8.6e-07
GO:0009620	response to fungus	253	49	19.72	1.1e-06
GO:0055085	transmembrane transport	639	83	49.81	1.0e-05
GO:0009627	systemic acquired resistance	178	33	13.87	1.1e-05
GO:0050832	defense response to fungus	170	29	13.25	2.0e-05
GO:0043069	negative regulation of programmed cell d...	82	19	6.39	2.7e-05
GO:0042538	hyperosmotic salinity response	72	17	5.61	2.8e-05
GO:0010363	regulation of plant-type hypersensitive ...	150	27	11.69	6.2e-05
GO:0080167	response to karrikin	103	20	8.03	0.00012
GO:0042542	response to hydrogen peroxide	151	21	11.77	0.00023
GO:0009753	response to jasmonic acid	207	35	16.13	0.00031
GO:0009409	response to cold	422	49	32.89	0.00033
GO:0009723	response to ethylene	153	24	11.93	0.00038
GO:0015718	monocarboxylic acid transport	15	6	1.17	0.00051
GO:0009733	response to auxin	220	32	17.15	0.00054
GO:0071805	potassium ion transmembrane transport	29	9	2.26	0.00058
GO:0046685	response to arsenic-containing substance	26	8	2.03	0.00058
GO:0043090	amino acid import	49	13	3.82	0.00063
GO:0016099	monoterpenoid biosynthetic process	7	4	0.55	0.00106
GO:0009863	salicylic acid mediated signaling pathwa...	126	22	9.82	0.00111
GO:0006612	protein targeting to membrane	177	26	13.8	0.00125
GO:0009408	response to heat	197	26	15.36	0.00132
GO:0050896	response to stimulus	4376	463	341.09	0.00140
GO:0015824	proline transport	30	8	2.34	0.00165
GO:0010253	UDP-rhamnose biosynthetic process	4	3	0.31	0.00178
GO:0006559	L-phenylalanine catabolic process	4	3	0.31	0.00178
GO:0009828	plant-type cell wall loosening	4	3	0.31	0.00178
GO:0071310	cellular response to organic substance	699	79	54.48	0.00221
GO:0002679	respiratory burst involved in defense re...	25	7	1.95	0.00236
GO:0031408	oxylipin biosynthetic process	25	7	1.95	0.00236
GO:0006979	response to oxidative stress	375	47	29.23	0.00247
GO:0015914	phospholipid transport	20	6	1.56	0.00330
GO:0015749	monosaccharide transport	5	3	0.39	0.00419
GO:0045226	extracellular polysaccharide biosyntheti...	5	3	0.39	0.00419
GO:0006855	drug transmembrane transport	42	9	3.27	0.00437
GO:0030433	ER-associated ubiquitin-dependent protei...	10	4	0.78	0.00526
GO:0009867	jasmonic acid mediated signaling pathway	111	17	8.65	0.00536
GO:0009446	putrescine biosynthetic process	5	4	0.39	0.00605
GO:0006984	ER-nucleus signaling pathway	84	25	6.55	0.00753
GO:0009698	phenylpropanoid metabolic process	216	33	16.84	0.00755
GO:0055074	calcium ion homeostasis	19	5	1.48	0.00787
GO:0009435	NAD biosynthetic process	6	3	0.47	0.00789
GO:0009704	de-etiolation	6	3	0.47	0.00789
GO:0015786	UDP-glucose transport	6	3	0.47	0.00789
GO:0000038	very long-chain fatty acid metabolic pro...	38	8	2.96	0.00790
GO:0010025	wax biosynthetic process	24	6	1.87	0.00878
Gene Ontology: Plant GO Slim / Aspect: Biological Function
GO.ID	Term	Annotated	Significant	Expected	adj. P-Value
GO:0006950	response to stress	2520	276	196.47	1.2e-10
GO:0055085	transmembrane transport	643	84	50.13	1.5e-06
GO:0008219	cell death	282	43	21.99	1.5e-05
GO:0002376	immune system process	506	66	39.45	2.1e-05
GO:0007165	signal transduction	1175	126	91.61	0.0001
GO:0006810	transport	2373	237	185.01	0.0011
Gene Families: MapMan Bins / Level: 3
ID	Term	Annotated	Significant	P-Value	Q-Value
29.2.1	protein.synthesis.ribosomal_protein	646	77	0.000325052	0.00845134
29.5.3	protein.degradation.cysteine_protease	44	11	0.00110293	0.0143381
20.2.3	stress.abiotic.drought/salt	43	11	0.00273719	0.0237223
16.8.3	secondary_metabolism.flavonoids.dihydroflavonols	23	11	0.00711917	0.0462746
27.3.35	RNA.regulation_of_transcription.bZIP_transcription_factor_family	24	12	0.0113121	0.0544952
20.1.7	stress.biotic.PR-proteins	24	15	0.0125758	0.0544952
27.3.32	RNA.regulation_of_transcription.WRKY_domain_transcription_factor_family	23	17	0.0175281	0.0642141
29.5.5	protein.degradation.serine_protease	49	17	0.0197582	0.0642141
