# Supplementary material for: Venus flytrap carnivorous lifestyle builds on herbivore defense strategies
Source: HighWire-hosted journal article supplement (doi:10.1101/gr.202200.115), 2016-05-04
Supplement: Supplemental_Table_S10.xlsx [file Supplemental_Table_S10.xlsx]

## Sheet: JA Pathway
Unigene	Representative Isoform	Synonym	Description	CRB Ortholog	EC
comp203314_c1.0	comp203314_c1.0_seq1	JMT	jasmonic acid carboxyl methyltransferase	AT1G19640*	2.1.1.141
comp234676_c0	comp234676_c0_seq2	ACX3, ATACX3	acyl-CoA oxidase 3	AT1G06290	1.3.3.6
comp214498_c0	comp214498_c0_seq1	DGL1	dolichyl-diphosphooligosaccharide-protein glycosyltransferase 48kDa subunit family protein	AT5G66680
comp228116_c1.0	comp228116_c1.0_seq2	OPR3	oxophytodienoate-reductase 3	AT2G06050	1.3.1.42
comp230437_c0	comp230437_c0_seq2	AOS, CYP74A, DDE2	allene oxide synthase	AT5G42650	4.2.1.92
comp233950_c1.0	comp233950_c1.0_seq2	OPCL1	OPC-8:0 CoA ligase1	AT1G20510	6.2.1.-
comp224086_c0	comp224086_c0_seq1	JAZ1, TIFY10A	jasmonate-zim-domain protein 1	AT1G19180
comp231932_c1.1	comp231932_c1.1_seq2	AOC2	allene oxide cyclase 2	AT3G25770	5.3.99.6
comp229648_c0	comp229648_c0_seq1	COI1	RNI-like superfamily protein	AT2G39940
comp218803_c0.2	comp218803_c0.2_seq1	LOX2, ATLOX2	lipoxygenase 2	AT3G45140	1.13.11.12
comp214700_c0	comp214700_c0_seq5	COS1	6,7-dimethyl-8-ribityllumazine synthase / DMRL synthase / lumazine synthase / riboflavin synthase	AT2G44050
comp223176_c1.1	comp223176_c1.1_seq6	JAR1	Auxin-responsive GH3 family protein	AT2G46370
comp231854_c0.0	comp231854_c0.0_seq1	AIM1	Enoyl-CoA hydratase/isomerase family	AT4G29010	4.2.1.17,1.1.1.35,1.1.1.211
comp208017_c0	comp208017_c0_seq1	PKT3, PED1, KAT2	peroxisomal 3-ketoacyl-CoA thiolase 3	AT2G33150	2.3.1.16
comp220150_c0	comp220150_c0_seq1	PXA1	peroxisomal ABC transporter 1	AT4G39850
				* manually curated based on bit score
