# Supplementary material for: Venus flytrap carnivorous lifestyle builds on herbivore defense strategies
Source: HighWire-hosted journal article supplement (doi:10.1101/gr.202200.115), 2016-05-04
Supplement: Supplemental_Table_S11.xlsx [file Supplemental_Table_S11.xlsx]

## Sheet: Enrichment Coronatine-activated Glands
Gene Ontology: Generic GO / Aspect: Biological Function
GO.ID	Term	Annotated	Significant	Expected	adj. P-Value
GO:0034976	response to endoplasmic reticulum stress	165	103	56.01	6.8e-10
GO:0048193	Golgi vesicle transport	265	142	89.96	1.0e-08
GO:0015031	protein transport	784	345	266.13	3.4e-08
GO:0007264	small GTPase mediated signal transductio...	103	60	34.96	6.2e-08
GO:0046686	response to cadmium ion	513	231	174.14	6.8e-08
GO:0006457	protein folding	258	120	87.58	5.1e-06
GO:0030968	endoplasmic reticulum unfolded protein r...	79	46	26.82	8.0e-06
GO:0009738	abscisic acid-activated signaling pathwa...	140	71	47.52	1.1e-05
GO:0001510	RNA methylation	122	62	41.41	1.2e-05
GO:0000902	cell morphogenesis	513	162	174.14	1.5e-05
GO:0006499	N-terminal protein myristoylation	75	43	25.46	2.7e-05
GO:0016192	vesicle-mediated transport	485	243	164.64	2.7e-05
GO:0006635	fatty acid beta-oxidation	121	63	41.07	2.9e-05
GO:0042542	response to hydrogen peroxide	108	56	36.66	9.0e-05
GO:0043069	negative regulation of programmed cell d...	79	43	26.82	0.00014
GO:0055085	transmembrane transport	679	294	230.49	0.00017
GO:0016049	cell growth	532	181	180.59	0.00024
GO:0071805	potassium ion transmembrane transport	38	24	12.9	0.00025
GO:0009407	toxin catabolic process	89	46	30.21	0.00041
GO:0009408	response to heat	203	95	68.91	0.00042
GO:0003333	amino acid transmembrane transport	21	15	7.13	0.00050
GO:0006891	intra-Golgi vesicle-mediated transport	44	26	14.94	0.00054
GO:0080129	proteasome core complex assembly	79	41	26.82	0.00074
GO:0009620	response to fungus	282	118	95.73	0.00075
GO:0006888	ER to Golgi vesicle-mediated transport	84	43	28.51	0.00080
GO:0006626	protein targeting to mitochondrion	78	42	26.48	0.00094
GO:0006839	mitochondrial transport	103	59	34.96	0.00101
GO:0046482	para-aminobenzoic acid metabolic process	26	17	8.83	0.00103
GO:0007568	aging	107	45	36.32	0.00106
GO:0001731	formation of translation preinitiation c...	20	14	6.79	0.00107
GO:0006865	amino acid transport	160	82	54.31	0.00114
GO:0009870	defense response signaling pathway, resi...	11	9	3.73	0.00158
GO:0006446	regulation of translational initiation	29	18	9.84	0.00178
GO:0051788	response to misfolded protein	109	52	37	0.00195
GO:0009651	response to salt stress	579	242	196.54	0.00205
GO:0009611	response to wounding	189	84	64.16	0.00265
GO:0042128	nitrate assimilation	8	7	2.72	0.00291
GO:0006623	protein targeting to vacuole	86	42	29.19	0.00296
GO:0016558	protein import into peroxisome matrix	62	32	21.05	0.00304
GO:0043161	proteasome-mediated ubiquitin-dependent ...	93	43	31.57	0.00328
GO:0071472	cellular response to salt stress	10	8	3.39	0.00386
GO:0019243	methylglyoxal catabolic process to D-lac...	70	35	23.76	0.00394
GO:0044242	cellular lipid catabolic process	175	86	59.4	0.00437
GO:0044070	regulation of anion transport	22	15	7.47	0.00448
GO:0006828	manganese ion transport	8	6	2.72	0.00450
GO:0006090	pyruvate metabolic process	379	101	128.65	0.00468
GO:0002679	respiratory burst involved in defense re...	31	18	10.52	0.00499
GO:0010286	heat acclimation	46	24	15.61	0.00813
GO:0002213	defense response to insect	19	12	6.45	0.00869
GO:0010204	defense response signaling pathway, resi...	9	7	3.06	0.00924
GO:0007031	peroxisome organization	96	47	32.59	0.00986
Gene Ontology: Plant GO Slim / Aspect: Biological Function
GO.ID	Term	Annotated	Significant	Expected	adj. P-Value
GO:0016192	vesicle-mediated transport	485	243	164.57	5.1e-14
GO:0055085	transmembrane transport	680	294	230.73	1.3e-07
GO:0006457	protein folding	258	120	87.54	1.6e-05
GO:0006605	protein targeting	557	233	189	4.2e-05
GO:0007005	mitochondrion organization	115	56	39.02	0.00072
GO:0007165	signal transduction	1212	458	411.25	0.00162
GO:0022618	ribonucleoprotein complex assembly	32	18	10.86	0.00779
GO:0006950	response to stress	2600	933	882.21	0.00929
Gene Families: MapMan Bins / Level: 3
ID	Term	Annotated	Significant	P-Value	Q-Value
29.2.1	protein.synthesis.ribosomal_protein	646	77	0.00375738	0.0526155
27.3.11	RNA.regulation_of_transcription.C2H2_zinc_finger_family	35	15	0.00478323	0.0526155
29.3.4	protein.targeting.secretory_pathway	95	35	0.0124138	0.0708005
20.1.7	stress.biotic.PR-proteins	24	11	0.016526	0.0708005
27.3.32	RNA.regulation_of_transcription.WRKY_domain_transcription_factor_family	23	14	0.0170925	0.0708005
29.5.5	protein.degradation.serine_protease	49	15	0.0193092	0.0708005
29.5.3	protein.degradation.cysteine_protease	44	13	0.023292	0.0732036
