# Supplementary material for: Venus flytrap carnivorous lifestyle builds on herbivore defense strategies
Source: HighWire-hosted journal article supplement (doi:10.1101/gr.202200.115), 2016-05-04
Supplement: Supplemental_Table_S12.xlsx [file Supplemental_Table_S12.xlsx]

## Sheet: Enrichment Coronatine-stimulated Traps
Gene Ontology: Generic GO / Aspect: Biological Function
GO.ID	Term	Annotated	Significant	Expected	adj. P-Value
GO:0009738	abscisic acid-activated signaling pathwa...	135	19	5.38	5.8e-06
GO:0046686	response to cadmium ion	457	38	18.22	1.3e-05
GO:0080167	response to karrikin	104	15	4.15	1.5e-05
GO:0034976	response to endoplasmic reticulum stress	160	25	6.38	1.8e-05
GO:0010200	response to chitin	154	18	6.14	4.0e-05
GO:0030968	endoplasmic reticulum unfolded protein r...	77	12	3.07	4.8e-05
GO:0010363	regulation of plant-type hypersensitive ...	144	17	5.74	5.8e-05
GO:0016099	monoterpenoid biosynthetic process	8	4	0.32	0.00015
GO:0006032	chitin catabolic process	9	4	0.36	0.00027
GO:0055114	oxidation-reduction process	1261	70	50.27	0.00033
GO:0009414	response to water deprivation	222	22	8.85	0.00048
GO:0006598	polyamine catabolic process	18	5	0.72	0.00055
GO:0009408	response to heat	188	17	7.49	0.00071
GO:0009698	phenylpropanoid metabolic process	109	10	4.34	0.00071
GO:0010197	polar nucleus fusion	19	5	0.76	0.00072
GO:0006612	protein targeting to membrane	164	16	6.54	0.00084
GO:0042538	hyperosmotic salinity response	78	10	3.11	0.00101
GO:0055085	transmembrane transport	636	45	25.35	0.00110
GO:0009435	NAD biosynthetic process	6	3	0.24	0.00115
GO:0009867	jasmonic acid mediated signaling pathway	108	12	4.31	0.00120
GO:0009813	flavonoid biosynthetic process	117	12	4.66	0.00216
GO:0052542	defense response by callose deposition	40	7	1.59	0.00235
GO:0046482	para-aminobenzoic acid metabolic process	25	5	1	0.00270
GO:0009704	de-etiolation	8	3	0.32	0.00303
GO:0043069	negative regulation of programmed cell d...	76	9	3.03	0.00312
GO:0035556	intracellular signal transduction	446	30	17.78	0.00351
GO:0009611	response to wounding	177	16	7.06	0.00358
GO:0050896	response to stimulus	4182	226	166.7	0.00371
GO:0016998	cell wall macromolecule catabolic proces...	17	4	0.68	0.00392
GO:0050832	defense response to fungus	170	15	6.78	0.00405
GO:1901700	response to oxygen-containing compound	1251	100	49.87	0.00416
GO:0006535	cysteine biosynthetic process from serin...	9	3	0.36	0.00442
GO:0030433	ER-associated ubiquitin-dependent protei...	9	3	0.36	0.00442
GO:0071310	cellular response to organic substance	715	43	28.5	0.00442
GO:0042398	cellular modified amino acid biosyntheti...	60	7	2.39	0.00449
GO:0006537	glutamate biosynthetic process	3	2	0.12	0.00463
GO:0080148	negative regulation of response to water...	3	2	0.12	0.00463
GO:0052033	pathogen-associated molecular pattern de...	3	2	0.12	0.00463
GO:0030643	cellular phosphate ion homeostasis	3	2	0.12	0.00463
GO:0060416	response to growth hormone	3	2	0.12	0.00463
GO:0009744	response to sucrose	111	11	4.42	0.00467
GO:0009627	systemic acquired resistance	176	16	7.02	0.00496
GO:0009863	salicylic acid mediated signaling pathwa...	121	12	4.82	0.00583
GO:0008295	spermidine biosynthetic process	10	3	0.4	0.00612
GO:0006071	glycerol metabolic process	10	3	0.4	0.00612
GO:0042542	response to hydrogen peroxide	100	10	3.99	0.00643
GO:0002679	respiratory burst involved in defense re...	31	5	1.24	0.00709
GO:0010371	regulation of gibberellin biosynthetic p...	4	2	0.16	0.00902
GO:0010253	UDP-rhamnose biosynthetic process	4	2	0.16	0.00902
GO:0048838	release of seed from dormancy	4	2	0.16	0.00902
GO:0009723	response to ethylene	162	16	6.46	0.00905
GO:1901701	cellular response to oxygen-containing c...	471	35	18.77	0.00923
GO:0015824	proline transport	33	5	1.32	0.00928
Gene Ontology: Plant GO Slim / Aspect: Biological Function
GO.ID	Term	Annotated	Significant	Expected	adj. P-Value
GO:0009719	response to endogenous stimulus	1024	71	40.86	2.3e-06
GO:0006950	response to stress	2439	136	97.33	8.1e-06
GO:0008219	cell death	257	25	10.26	3.5e-05
GO:0009628	response to abiotic stimulus	1877	105	74.9	0.00012
GO:0009607	response to biotic stimulus	831	51	33.16	0.00129
GO:0006810	transport	2286	114	91.23	0.00449
GO:0019725	cellular homeostasis	200	16	7.98	0.00636
GO:0007165	signal transduction	1147	62	45.77	0.00781
GO:0009605	response to external stimulus	1198	65	47.81	0.00839
Gene Families: MapMan Bins / Level: 3
ID	Term	Annotated	Significant	P-Value	Q-Value
29.5.11	protein.degradation.ubiquitin	345	106	1.87251e-08	4.49403e-07
29.2.1	protein.synthesis.ribosomal_protein	646	73	3.54635e-07	4.25561e-06
27.3.99	RNA.regulation_of_transcription.unclassified	115	49	0.000148286	0.00118629
29.3.4	protein.targeting.secretory_pathway	95	38	0.000443421	0.00249875
35.1.5	not_assigned.no_ontology.pentatricopeptide_(PPR)_repeat-containing_protein	133	43	0.000520574	0.00249875
20.2.1	stress.abiotic.heat	120	32	0.00176205	0.00704821
29.5.5	protein.degradation.serine_protease	49	19	0.00288262	0.00988327
29.4.1	protein.postranslational_modification.kinase	62	16	0.00345638	0.0100207
27.3.35	RNA.regulation_of_transcription.bZIP_transcription_factor_family	24	12	0.00413531	0.0100207
27.1.19	RNA.processing.ribonucleases	22	11	0.00417529	0.0100207
29.2.3	protein.synthesis.initiation	87	21	0.00633287	0.0138172
29.5.3	protein.degradation.cysteine_protease	44	14	0.00857974	0.0171595
20.2.3	stress.abiotic.drought/salt	43	10	0.0106411	0.019645
16.8.3	secondary_metabolism.flavonoids.dihydroflavonols	23	12	0.011893	0.0203881
29.2.2	protein.synthesis.ribosome_biogenesis	79	21	0.0284002	0.0427026
27.3.11	RNA.regulation_of_transcription.C2H2_zinc_finger_family	35	14	0.031408	0.0427026
31.3.1	cell.cycle.peptidylprolyl_isomerase	43	10	0.0319272	0.0427026
31.1.1	cell.organisation.cytoskeleton	75	11	0.032027	0.0427026
11.9.3	lipid_metabolism.lipid_degradation.lysophospholipases	19	10	0.0414219	0.0523223
17.2.3	hormone_metabolism.auxin.induced-regulated-responsive-activated	44	19	0.043603	0.0523236
27.3.3	RNA.regulation_of_transcription.AP2/EREBP,_APETALA2/Ethylene-responsive_element_binding_protein_family	22	10	0.0466141	0.0532733
27.3.32	RNA.regulation_of_transcription.WRKY_domain_transcription_factor_family	23	11	0.0518444	0.0565575
