# Supplementary material for: Venus flytrap carnivorous lifestyle builds on herbivore defense strategies
Source: HighWire-hosted journal article supplement (doi:10.1101/gr.202200.115), 2016-05-04
Supplement: Supplemental_Table_S13.xlsx [file Supplemental_Table_S13.xlsx]

## Sheet: ER and ROS
Unigene	Representative Isoform	Synonym	Description	CRB Ortholog	Class
comp132955_c0	comp132955_c0_seq1	NA	Cysteine proteinases superfamily protein	AT3G57810	Protein degradation
comp133343_c0	comp133343_c0_seq1	NA	Galactose oxidase/kelch repeat superfamily protein	AT1G22040	Protein degradation
comp14154022_c0	comp14154022_c0_seq1	NA	Cysteine proteinases superfamily protein	AT3G57810	Protein degradation
comp14966649_c0	comp14966649_c0_seq1	MAP1A	methionine aminopeptidase 1A	AT2G45240	Protein degradation
comp170297_c0	comp170297_c0_seq1	NA	Eukaryotic aspartyl protease family protein	AT1G01300	Protein degradation
comp185957_c0	comp185957_c0_seq1	SCPL45	serine carboxypeptidase-like 45	AT1G28110	Protein degradation
comp186996_c0	comp186996_c0_seq1	NA	Eukaryotic aspartyl protease family protein	AT2G39710	Protein degradation
comp188997_c0.0	comp188997_c0.0_seq1	NA	Zn-dependent exopeptidases superfamily protein	AT1G67420	Protein degradation
comp196381_c0	comp196381_c0_seq1	NA	Galactose oxidase/kelch repeat superfamily protein	AT1G80440	Protein degradation
comp200993_c0	comp200993_c0_seq1	NA	SBP (S-ribonuclease binding protein) family protein	AT3G12920	Protein degradation
comp202023_c0	comp202023_c0_seq1	NA	Cystatin/monellin superfamily protein	AT5G47550	Protein degradation
comp205477_c0	comp205477_c0_seq5	CPR30	F-box and associated interaction domains-containing protein	AT4G12560	Protein degradation
comp205914_c0	comp205914_c1_seq1	SCPL49, CPY	SERINE CARBOXYPEPTIDASE-LIKE 49	AT3G10410	Protein degradation
comp205914_c1	comp205914_c1_seq1	SCPL49, CPY	SERINE CARBOXYPEPTIDASE-LIKE 49	AT3G10410	Protein degradation
comp208943_c0.0	comp208943_c0.0_seq1	NA	Eukaryotic aspartyl protease family protein	AT4G33490	Protein degradation
comp209350_c0	comp209350_c0_seq2	PUB15	Plant U-Box 15	AT5G42340	Protein degradation
comp212804_c0	comp212804_c0_seq1	NA	RING/U-box superfamily protein	AT3G09770	Protein degradation
comp214244_c0.0	comp214244_c0.0_seq1	SCPL49, CPY	SERINE CARBOXYPEPTIDASE-LIKE 49	AT3G10410	Protein degradation
comp214993_c0	comp214993_c0_seq1	scpl50	serine carboxypeptidase-like 50	AT1G15000	Protein degradation
comp216105_c1.1	comp216105_c1.1_seq1	NA	Eukaryotic aspartyl protease family protein	AT2G03200	Protein degradation
comp216662_c0	comp216662_c0_seq2	NA	Cysteine proteinases superfamily protein	AT3G57810	Protein degradation
comp217603_c0.0	comp217603_c0.0_seq3	APM1, ATAPM1	aminopeptidase M1	AT4G33090	Protein degradation
comp217961_c0	comp217961_c0_seq13	NA	Galactose oxidase/kelch repeat superfamily protein	AT2G02870	Protein degradation
comp219980_c3	comp219980_c3_seq1	NA	ARM repeat superfamily protein	AT5G01830	Protein degradation
comp220173_c0	comp220173_c0_seq1	NA	Eukaryotic aspartyl protease family protein	AT4G16563	Protein degradation
comp220585_c0.0	comp220585_c0.0_seq1	NA	AAA-type ATPase family protein	AT2G18330	Protein degradation
comp221700_c0	comp221700_c0_seq1	NA	CAAX amino terminal protease family protein	AT5G60750	Protein degradation
comp222011_c0	comp222011_c0_seq1	ATSBT5.4, SBT5.4	Subtilase family protein	AT5G59810	Protein degradation
comp222097_c4.0	comp222097_c4.0_seq3	BLOS1	GCN5L1 family protein	AT2G30330	Protein degradation
comp222669_c0	comp222669_c0_seq2	NA	RING/U-box superfamily protein	AT2G42360	Protein degradation
comp222809_c2.0	comp222809_c2.0_seq1	APM1, ATAPM1	aminopeptidase M1	AT4G33090	Protein degradation
comp223819_c0.1	comp223819_c0.1_seq1	NA	Cysteine proteinases superfamily protein	AT3G02070	Protein degradation
comp224038_c1.1	comp224038_c1.1_seq2	NA	P-loop containing nucleoside triphosphate hydrolases superfamily protein	AT2G46620	Protein degradation
comp224256_c1.2	comp224256_c1.2_seq5	NA	Cysteine proteinases superfamily protein	AT3G22260	Protein degradation
comp225565_c0.0	comp225565_c0.0_seq1	ATSBT5.4, SBT5.4	Subtilase family protein	AT5G59810	Protein degradation
comp226230_c0	comp226230_c0_seq1	NA	Zincin-like metalloproteases family protein	AT5G65620	Protein degradation
comp226381_c1.2	comp226381_c1.2_seq2	NA	RING/U-box superfamily protein	AT2G27940	Protein degradation
comp226601_c1	comp226601_c1_seq1	NA	Cysteine proteinases superfamily protein	AT3G02070	Protein degradation
comp22667094_c0	comp22667094_c0_seq1	NA	Subtilase family protein	AT3G14067	Protein degradation
comp226815_c0.0	comp224256_c1.2_seq5	MAP1A	methionine aminopeptidase 1A	AT2G45240	Protein degradation
comp226968_c0	comp226968_c0_seq2	scpl44	serine carboxypeptidase-like 44	AT1G43780	Protein degradation
comp226968_c1.1	comp226968_c1.1_seq2	scpl42	serine carboxypeptidase-like 42	AT5G42240	Protein degradation
comp226968_c1.3	comp226968_c1.3_seq1	scpl42	serine carboxypeptidase-like 42	AT5G42240	Protein degradation
comp226993_c2	comp226993_c2_seq1	NA	ARM repeat superfamily protein	AT1G71020	Protein degradation
comp227018_c0	comp227018_c0_seq1	UBP16	ubiquitin-specific protease 16	AT4G24560	Protein degradation
comp227349_c0.0	comp227349_c0.0_seq5	ATAPP1, APP1	aminopeptidase P1	AT4G36760	Protein degradation
comp227360_c4.0	comp227360_c4.0_seq2	NLA, BAH1	SPX (SYG1/Pho81/XPR1) domain-containing protein	AT1G02860	Protein degradation
comp227752_c6.0	comp227752_c6.0_seq5	ATL6	RING/U-box superfamily protein	AT3G05200	Protein degradation
comp227785_c0.0	comp227785_c0.0_seq13	scpl40	serine carboxypeptidase-like 40	AT3G63470	Protein degradation
comp227910_c0	comp227910_c0_seq1	NA	RING/FYVE/PHD zinc finger superfamily protein	AT1G02610	Protein degradation
comp228211_c0.0	comp228211_c0.0_seq5	ATGP4	Ubiquitin family protein	AT4G24990	Protein degradation
comp229677_c0	comp229677_c0_seq1	NA	Subtilase family protein	AT3G14067	Protein degradation
comp229817_c0.0	comp229817_c0.0_seq1	FBL17	RNI-like superfamily protein	AT3G54650	Protein degradation
comp230061_c3.3	comp230061_c3.3_seq1	ATCYSB, ATCYS6, CYSB	cystatin B	AT3G12490	Protein degradation
comp230226_c0	comp230226_c0_seq1	NA	RING/U-box superfamily protein	AT4G33565	Protein degradation
comp230330_c1	comp230330_c1_seq1	SCPL51	serine carboxypeptidase-like 51	AT2G27920	Protein degradation
comp231639_c2.0	comp231639_c2.0_seq3	NA	Peptidase M20/M25/M40 family protein	AT4G17830	Protein degradation
comp231795_c2.1	comp231795_c2.1_seq1	NA	zinc finger protein-related	AT5G54630	Protein degradation
comp232310_c0.0	comp232310_c0.0_seq1	SCPL45	serine carboxypeptidase-like 45	AT1G28110	Protein degradation
comp234049_c3.0	comp234049_c3.0_seq1	NA	Zincin-like metalloproteases family protein	AT5G10540	Protein degradation
comp235455_c0	comp235455_c0_seq1	UBC32	ubiquitin-conjugating enzyme 32	AT3G17000	Protein degradation
comp243254_c0	comp243254_c0_seq1	ATL2, TL2	TOXICOS EN LEVADURA 2	AT3G16720	Protein degradation
comp62819_c0	comp62819_c0_seq1	MAP1A	methionine aminopeptidase 1A	AT2G45240	Protein degradation
comp67120_c0	comp67120_c0_seq1	ATSBT5.4, SBT5.4	Subtilase family protein	AT5G59810	Protein degradation
comp67716_c0	comp67716_c0_seq1	NA	Subtilase family protein	AT3G14067	Protein degradation
comp7255742_c0	comp7255742_c0_seq1	SCPL49, CPY	SERINE CARBOXYPEPTIDASE-LIKE 49	AT3G10410	Protein degradation
comp91325_c0	comp91325_c0_seq1	NA	RING/U-box superfamily protein	AT5G19080	Protein degradation
comp187075_c0	comp187075_c0_seq1	CPN20, CPN10, CHCPN10, ATCPN21, CPN21	chaperonin 20	AT5G20720	Protein folding
comp213011_c0	comp213011_c0_seq1	HSC70-1, HSP70-1, AT-HSC70-1, HSC70	heat shock cognate protein 70-1	AT5G02500	Protein folding
comp213576_c0	comp213576_c0_seq1	HSC70-1, HSP70-1, AT-HSC70-1, HSC70	heat shock cognate protein 70-1	AT5G02500	Protein folding
comp230338_c2.0	comp230338_c2.0_seq1	CPN20, CPN10, CHCPN10, ATCPN21, CPN21	chaperonin 20	AT5G20720	Protein folding
comp231261_c0.3	comp231261_c0.3_seq1	CPN20, CPN10, CHCPN10, ATCPN21, CPN21	chaperonin 20	AT5G20720	Protein folding
comp7107177_c0	comp7107177_c0_seq1	HSC70-1, HSP70-1, AT-HSC70-1, HSC70	heat shock cognate protein 70-1	AT5G02500	Protein folding
comp169141_c0	comp169141_c0_seq1	DGL1	dolichyl-diphosphooligosaccharide-protein glycosyltransferase 48kDa subunit family protein	AT5G66680	Protein glycolysation
comp187496_c0.1	comp187496_c0.1_seq2	DGL1	dolichyl-diphosphooligosaccharide-protein glycosyltransferase 48kDa subunit family protein	AT5G66680	Protein glycolysation
comp196113_c0	comp196113_c0_seq1	NA	Galactosyltransferase family protein	AT5G57500	Protein glycolysation
comp214498_c0	comp214498_c0_seq1	DGL1	dolichyl-diphosphooligosaccharide-protein glycosyltransferase 48kDa subunit family protein	AT5G66680	Protein glycolysation
comp217001_c3	comp217001_c3_seq1	NA	Glycosyltransferase family 29 (sialyltransferase) family protein	AT1G08280	Protein glycolysation
comp227733_c0.0	comp227733_c0.0_seq2	NA	Glycosyltransferase family 29 (sialyltransferase) family protein	AT1G08280	Protein glycolysation
comp228995_c5	comp228995_c5_seq2	HEXO2, ATHEX3	beta-hexosaminidase 2	AT1G05590	Protein glycolysation
comp11797309_c0	comp11797309_c0_seq1	NA	secE/sec61-gamma protein transport protein	AT5G50460	Protein targeting
comp133172_c0	comp133172_c0_seq1	NTF2B	nuclear transport factor 2B	AT1G27970	Protein targeting
comp154762_c0	comp154762_c0_seq1	NA	secE/sec61-gamma protein transport protein	AT5G50460	Protein targeting
comp178795_c0	comp178795_c0_seq1	NA	secE/sec61-gamma protein transport protein	AT5G50460	Protein targeting
comp192709_c0	comp192709_c0_seq1	GAMMA-VPE, GAMMAVPE	gamma vacuolar processing enzyme	AT4G32940	Protein targeting
comp223109_c0	comp223109_c0_seq1	NA	Sec23/Sec24 protein transport family protein	AT4G01810	Protein targeting
comp224238_c1	comp224238_c1_seq6	PMP22	Peroxisomal membrane 22 kDa (Mpv17/PMP22) family protein	AT4G04470	Protein targeting
comp226648_c3.0	comp226648_c3.0_seq3	PEX1	peroxisome 1	AT5G08470	Protein targeting
comp228697_c1.0	comp228697_c1.0_seq1	ATSFH12, SFH12	SEC14-like 12	AT4G36490	Protein targeting
comp230102_c0	comp230102_c0_seq1	NA	secE/sec61-gamma protein transport protein	AT5G50460	Protein targeting
comp233015_c1	comp233015_c1_seq1	NA	secE/sec61-gamma protein transport protein	AT5G50460	Protein targeting
comp3003397_c0	comp3003397_c0_seq1	NA	secE/sec61-gamma protein transport protein	AT5G50460	Protein targeting
comp51862_c0	comp51862_c0_seq1	NA	secE/sec61-gamma protein transport protein	AT5G50460	Protein targeting
comp8000346_c0	comp8000346_c0_seq1	GAMMA-VPE, GAMMAVPE	gamma vacuolar processing enzyme	AT4G32940	Protein targeting
comp90252_c0.0	comp90252_c0.0_seq1	GAMMA-VPE, GAMMAVPE	gamma vacuolar processing enzyme	AT4G32940	Protein targeting
comp10634758_c0	comp10634758_c0_seq1	SIR	sulfite reductase	AT5G04590	Redox response
comp129213_c0	comp129213_c0_seq1	ATGPX6, PHGPX, LSC803, GPX6	glutathione peroxidase 6	AT4G11600	Redox response
comp148744_c0	comp148744_c0_seq1	AOX1A, ATAOX1A	alternative oxidase 1A	AT3G22370	Redox response
comp157495_c0	comp157495_c0_seq1	B5 #4, ATCB5-B, CB5-B	cytochrome B5 isoform B	AT2G32720	Redox response
comp166457_c0	comp166457_c0_seq1	ATPDIL2-1, UNE5, MEE30, PDI11, ATPDI11	thioredoxin family protein	AT2G47470	Redox response
comp166457_c1	comp166457_c1_seq1	ATPDIL2-1, UNE5, MEE30, PDI11, ATPDI11	thioredoxin family protein	AT2G47470	Redox response
comp168936_c1	comp168936_c1_seq1	ATGPX6, PHGPX, LSC803, GPX6	glutathione peroxidase 6	AT4G11600	Redox response
comp169504_c0	comp169504_c0_seq1	ATTRX1, ATTRX H1, TRX1	thioredoxin H-type 1	AT3G51030	Redox response
comp169629_c0	comp169629_c0_seq1	ATGR1, GR1	glutathione-disulfide reductase	AT3G24170	Redox response
comp17436712_c0	comp17436712_c0_seq1	B5 #4, ATCB5-B, CB5-B	cytochrome B5 isoform B	AT2G32720	Redox response
comp18558_c0	comp18558_c0_seq1	NA	thioredoxin family protein	AT4G04950	Redox response
comp188564_c0	comp188564_c0_seq1	B5 #4, ATCB5-B, CB5-B	cytochrome B5 isoform B	AT2G32720	Redox response
comp195883_c0	comp195883_c0_seq1	NA	Cupredoxin superfamily protein	AT4G39830	Redox response
comp196613_c0	comp196613_c0_seq1	ATPDIL2-1, UNE5, MEE30, PDI11, ATPDI11	thioredoxin family protein	AT2G47470	Redox response
comp200544_c0	comp200544_c0_seq1	ATTRX1, ATTRX H1, TRX1	thioredoxin H-type 1	AT3G51030	Redox response
comp203418_c0.0	comp203418_c0.0_seq4	NA	Cytochrome b561/ferric reductase transmembrane protein family	AT1G26100	Redox response
comp205361_c0	comp205361_c0_seq1	B5 #4, ATCB5-B, CB5-B	cytochrome B5 isoform B	AT2G32720	Redox response
comp205786_c0	comp205786_c0_seq5	ATGSTU8, GSTU8	glutathione S-transferase TAU 8	AT3G09270	Redox response
comp210664_c0.0	comp210664_c0.0_seq2	NA	Glutathione S-transferase family protein	AT4G19880	Redox response
comp212066_c0	comp212066_c0_seq2	NA	Glutaredoxin family protein	AT5G13810	Redox response
comp213958_c0	comp213958_c0_seq2	ATGPX6, PHGPX, LSC803, GPX6	glutathione peroxidase 6	AT4G11600	Redox response
comp215455_c0.1	comp215455_c0.1_seq1	GLT1	NADH-dependent glutamate synthase 1	AT5G53460	Redox response
comp215703_c0	comp215703_c0_seq1	ATGR1, GR1	glutathione-disulfide reductase	AT3G24170	Redox response
comp217977_c0	comp217977_c0_seq1	NDB3	NAD(P)H dehydrogenase B3	AT4G21490	Redox response
comp219595_c0	comp219595_c0_seq1	ATGPX6, PHGPX, LSC803, GPX6	glutathione peroxidase 6	AT4G11600	Redox response
comp221324_c2.0	comp221324_c2.0_seq1	NA	Peroxidase superfamily protein	AT1G24110	Redox response
comp224561_c0.0	comp224561_c0.0_seq1	ATPDIL2-2, ATPDI10, PDI10, PDIL2-2	PDI-like 2-2	AT1G04980	Redox response
comp226406_c0.0	comp226406_c0.0_seq1	SIR	sulfite reductase	AT5G04590	Redox response
comp226517_c0	comp226517_c0_seq2	NA	thioredoxin family protein	AT4G04950	Redox response
comp227315_c1	comp227315_c1_seq1	ATPDIL1-1, ATPDI5, PDI5, PDIL1-1	PDI-like 1-1	AT1G21750	Redox response
comp227524_c0	comp227524_c0_seq1	SIR	sulfite reductase	AT5G04590	Redox response
comp227524_c1.0	comp227524_c1.0_seq1	SIR	sulfite reductase	AT5G04590	Redox response
comp227524_c2.2	comp227524_c2.2_seq16	NA	Major facilitator superfamily protein	AT5G64500	Redox response
comp230552_c1	comp230552_c1_seq1	NA	Glutathione S-transferase family protein	AT4G19880	Redox response
comp230552_c2	comp230552_c2_seq1	NA	Glutathione S-transferase family protein	AT4G19880	Redox response
comp230552_c3	comp230552_c3_seq1	NA	Glutathione S-transferase family protein	AT4G19880	Redox response
comp231935_c1.0	comp231935_c1.0_seq1	ATB5-A, B5 #2, ATCB5-E, CB5-E	cytochrome B5 isoform E	AT5G53560	Redox response
comp232419_c2	comp232419_c2_seq5	NA	Glutaredoxin family protein	AT3G57070	Redox response
comp232591_c0.2	comp232591_c0.2_seq1	FdC2	2Fe-2S ferredoxin-like superfamily protein	AT4G14890	Redox response
comp234307_c3	comp234307_c3_seq1	NA	Peroxidase superfamily protein	AT3G01190	Redox response
comp235265_c0	comp235265_c0_seq1	NA	Glutathione S-transferase family protein	AT5G45020	Redox response
comp237284_c0	comp237284_c0_seq1	NA	Glutaredoxin family protein	AT5G13810	Redox response
comp32970_c0	comp32970_c0_seq1	NA	Glutathione S-transferase family protein	AT5G45020	Redox response
comp4065802_c0	comp4065802_c0_seq1	ATGPX6, PHGPX, LSC803, GPX6	glutathione peroxidase 6	AT4G11600	Redox response
comp46455_c0	comp46455_c0_seq1	B5 #4, ATCB5-B, CB5-B	cytochrome B5 isoform B	AT2G32720	Redox response
comp5426947_c0	comp5426947_c0_seq1	B5 #4, ATCB5-B, CB5-B	cytochrome B5 isoform B	AT2G32720	Redox response
comp68164_c0	comp68164_c0_seq1	FdC2	2Fe-2S ferredoxin-like superfamily protein	AT4G14890	Redox response
comp8016302_c0	comp8016302_c0_seq1	SIR	sulfite reductase	AT5G04590	Redox response
comp8915388_c0	comp8915388_c0_seq1	ATGR1, GR1	glutathione-disulfide reductase	AT3G24170	Redox response
comp9021800_c0	comp9021800_c0_seq1	SIR	sulfite reductase	AT5G04590	Redox response
comp10810092_c0	comp10810092_c0_seq1	ERD4	Early-responsive to dehydration stress protein (ERD4)	AT1G30360	Stress response
comp11996407_c0	comp11996407_c0_seq1	NA	DCD (Development and Cell Death) domain protein	AT5G42050	Stress response
comp132969_c0	comp132969_c0_seq1	NA	Ribosome associated membrane protein RAMP4	AT1G27330	Stress response
comp133201_c0.0	comp133201_c0.0_seq1	NA	DCD (Development and Cell Death) domain protein	AT5G42050	Stress response
comp134442_c1	comp134442_c1_seq1	AtRLP44, RLP44	receptor like protein 44	AT3G49750	Stress response
comp168951_c1	comp168951_c1_seq1	PR4, HEL, PR-4	pathogenesis-related 4	AT3G04720	Stress response
comp17132661_c0	comp17132661_c0_seq1	ERD4	Early-responsive to dehydration stress protein (ERD4)	AT1G30360	Stress response
comp187016_c0	comp187016_c0_seq1	HSP70, ATHSP70	heat shock protein 70	AT3G12580	Stress response
comp188256_c0	comp188256_c0_seq1	NA	Chaperone DnaJ-domain superfamily protein	AT2G17880	Stress response
comp189964_c0	comp189964_c0_seq1	HSP70, ATHSP70	heat shock protein 70	AT3G12580	Stress response
comp190044_c0	comp190044_c0_seq1	BIP1	heat shock protein 70 (Hsp 70) family protein	AT5G28540	Stress response
comp197863_c0	comp197863_c0_seq1	HSC70-1, HSP70-1, AT-HSC70-1, HSC70	heat shock cognate protein 70-1	AT5G02500	Stress response
comp199020_c1	comp199020_c1_seq1	HSP70, ATHSP70	heat shock protein 70	AT3G12580	Stress response
comp199955_c1	comp199955_c1_seq1	ATCHIA, CHIA	chitinase A	AT5G24090	Stress response
comp200977_c0	comp200977_c0_seq1	PCR2	PLANT CADMIUM RESISTANCE 2	AT1G14870	Stress response
comp204226_c1	comp204226_c1_seq1	NA	Expression of the gene is downregulated in the presence of paraquat, an inducer of photoxidative stress.	AT3G20340	Stress response
comp204510_c0	comp204510_c0_seq1	SHD, HSP90.7, AtHsp90.7, AtHsp90-7	Chaperone protein htpG family protein	AT4G24190	Stress response
comp206607_c0	comp206607_c0_seq1	NHL25	NDR1/HIN1-like 25	AT5G36970	Stress response
comp207243_c0	comp207243_c0_seq2	CSDP1	cold shock domain protein 1	AT4G36020	Stress response
comp20808669_c0	comp20808669_c0_seq1	NA	Ribosome associated membrane protein RAMP4	AT1G27330	Stress response
comp208969_c0.1	comp208969_c0.1_seq1	NA	Ribosome associated membrane protein RAMP4	AT1G27330	Stress response
comp211685_c0	comp211685_c0_seq1	RBOHD, ATRBOHD	respiratory burst oxidase homologue D	AT5G47910	Stress response
comp212940_c0	comp212940_c0_seq1	ARL1	ARG1-like 1	AT1G24120	Stress response
comp212940_c1	comp212940_c1_seq1	ARL1	ARG1-like 1	AT1G24120	Stress response
comp213132_c0	comp213132_c0_seq1	NA	S-adenosyl-L-methionine-dependent methyltransferases superfamily protein	AT1G04430	Stress response
comp213274_c0	comp214477_c0_seq1	BIP, BIP2	Heat shock protein 70 (Hsp 70) family protein	AT5G42020	Stress response
comp214477_c0	comp216856_c0_seq1	SHD, HSP90.7, AtHsp90.7, AtHsp90-7	Chaperone protein htpG family protein	AT4G24190	Stress response
comp214823_c0	comp214823_c0_seq1	NA	Methylenetetrahydrofolate reductase family protein	AT5G38710	Stress response
comp216130_c1	comp216130_c1_seq2	HSC70-1, HSP70-1, AT-HSC70-1, HSC70	heat shock cognate protein 70-1	AT5G02500	Stress response
comp216856_c0	comp216856_c0_seq1	ATEP3, ATCHITIV, CHIV, EP3	homolog of carrot EP3-3 chitinase	AT3G54420	Stress response
comp217413_c0.0	comp217413_c0.0_seq1	BIP, BIP2	Heat shock protein 70 (Hsp 70) family protein	AT5G42020	Stress response
comp219705_c0	comp219705_c0_seq1	HSC70-1, HSP70-1, AT-HSC70-1, HSC70	heat shock cognate protein 70-1	AT5G02500	Stress response
comp219716_c0	comp219716_c0_seq1	BIP, BIP2	Heat shock protein 70 (Hsp 70) family protein	AT5G42020	Stress response
comp220457_c0	comp220457_c0_seq1	ATP58IPK, P58IPK	homolog of mamallian P58IPK	AT5G03160	Stress response
comp220831_c0	comp220831_c0_seq3	NA	RmlC-like cupins superfamily protein	AT5G39120	Stress response
comp221010_c0	comp221010_c0_seq2	MLO5, ATMLO5	Seven transmembrane MLO family protein	AT2G33670	Stress response
comp221324_c2.1	comp221324_c2.1_seq1	ARL1	ARG1-like 1	AT1G24120	Stress response
comp222394_c1.0	comp222394_c1.0_seq3	NA	Leucine-rich repeat (LRR) family protein	AT5G23400	Stress response
comp224012_c3	comp224012_c3_seq2	NA	Pathogenesis-related thaumatin superfamily protein	AT1G75050	Stress response
comp225632_c0.0	comp225632_c0.0_seq2	NA	Pectin lyase-like superfamily protein	AT1G23460	Stress response
comp226446_c0	comp226446_c0_seq1	SLT1	HSP20-like chaperones superfamily protein	AT2G37570	Stress response
comp227608_c1	comp227608_c1_seq1	HSC70-1, HSP70-1, AT-HSC70-1, HSC70	heat shock cognate protein 70-1	AT5G02500	Stress response
comp229231_c0	comp229231_c0_seq1	ATERDJ3B, ERDJ3B	DNAJ heat shock family protein	AT3G62600	Stress response
comp229725_c1.0	comp229725_c1.0_seq3	HSP70, ATHSP70	heat shock protein 70	AT3G12580	Stress response
comp230357_c2	comp230357_c2_seq12	ATPRB1, PRB1	basic pathogenesis-related protein 1	AT2G14580	Stress response
comp230444_c2.0	comp230444_c2.0_seq1	NA	ERD (early-responsive to dehydration stress) family protein	AT1G11960	Stress response
comp230872_c6	comp230872_c6_seq2	ATCHIA, CHIA	chitinase A	AT5G24090	Stress response
comp231741_c1.2	comp231741_c1.2_seq5	NA	Molecular chaperone Hsp40/DnaJ family protein	AT1G80030	Stress response
comp232507_c3	comp232507_c3_seq1	NA	S-adenosyl-L-methionine-dependent methyltransferases superfamily protein	AT5G64030	Stress response
comp232642_c0	comp232642_c0_seq2	SLT1	HSP20-like chaperones superfamily protein	AT2G37570	Stress response
comp232715_c1	comp232715_c1_seq9	AtRLP50, RLP50	receptor like protein 50	AT4G13920	Stress response
comp233728_c1.0	comp233728_c1.0_seq25	NA	S-adenosyl-L-methionine-dependent methyltransferases superfamily protein	AT4G14360	Stress response
comp233731_c1.2	comp233731_c1.2_seq8	ERD4	Early-responsive to dehydration stress protein (ERD4)	AT1G30360	Stress response
comp233767_c0.1	comp233767_c0.1_seq29	NA	Adenine nucleotide alpha hydrolases-like superfamily protein	AT3G58450	Stress response
comp233886_c0	comp233886_c0_seq6	RPS5	Disease resistance protein (CC-NBS-LRR class) family	AT1G12220	Stress response
comp234052_c1.0	comp234052_c1.0_seq23	NA	S-adenosyl-L-methionine-dependent methyltransferases superfamily protein	AT3G51070	Stress response
comp234314_c0.1	comp234314_c0.1_seq2	ATEP3, ATCHITIV, CHIV, EP3	homolog of carrot EP3-3 chitinase	AT3G54420	Stress response
comp234482_c1.0	comp234482_c1.0_seq2	NA	Pathogenesis-related thaumatin superfamily protein	AT1G75050	Stress response
comp234852_c1	comp234852_c1_seq1	ATHCHIB, PR3, PR-3, CHI-B, B-CHI, HCHIB	basic chitinase	AT3G12500	Stress response
comp234997_c0	comp234997_c0_seq10	AtRLP7, RLP7	receptor like protein 7	AT1G47890	Stress response
comp236461_c0	comp236461_c0_seq1	NA	heat shock protein 70 (Hsp 70) family protein	AT4G16660	Stress response
comp27767_c0	comp27767_c0_seq1	BIP1	heat shock protein 70 (Hsp 70) family protein	AT5G28540	Stress response
comp33137_c0	comp33137_c0_seq1	NA	Ribosome associated membrane protein RAMP4	AT1G27330	Stress response
comp6000636_c0	comp6000636_c0_seq1	NA	Ribosome associated membrane protein RAMP4	AT1G27330	Stress response
comp67615_c0	comp67615_c0_seq1	ERD4	Early-responsive to dehydration stress protein (ERD4)	AT1G30360	Stress response
comp7107177_c0	comp7107177_c0_seq1	HSC70-1, HSP70-1, AT-HSC70-1, HSC70	heat shock cognate protein 70-1	AT5G02500	Stress response
comp8171591_c0	comp8171591_c0_seq1	HSP70, ATHSP70	heat shock protein 70	AT3G12580	Stress response
comp8719988_c0	comp8719988_c0_seq1	HSC70-1, HSP70-1, AT-HSC70-1, HSC70	heat shock cognate protein 70-1	AT5G02500	Stress response
comp8977569_c0	comp8977569_c0_seq1	SHD, HSP90.7, AtHsp90.7, AtHsp90-7	Chaperone protein htpG family protein	AT4G24190	Stress response
