# Supplementary material for: Venus flytrap carnivorous lifestyle builds on herbivore defense strategies
Source: HighWire-hosted journal article supplement (doi:10.1101/gr.202200.115), 2016-05-04
Supplement: Supplemental_Table_S14.xlsx [file Supplemental_Table_S14.xlsx]

## Sheet: PCD
Unigene	Representative Isoform	Synonym	Description	CRB Ortholog	Insect-activated Traps (vs Traps)	Insect-activated Glands (vs Glands)
comp132482_c0	comp132482_c0_seq1	DPL1, ATDPL1	dihydrosphingosine phosphate lyase	AT1G27980	yes	yes
comp133172_c0	comp133172_c0_seq1	NTF2B	nuclear transport factor 2B	AT1G27970	yes	yes
comp186996_c0	comp186996_c0_seq1	NA	Eukaryotic aspartyl protease family protein	AT2G39710	yes	yes
comp206630_c0.1	comp206630_c0.1_seq1	PLDP1, PLDZ1, PLDZETA1, PLD ZETA 1	phospholipase D P1	AT3G16785	yes	yes
comp212665_c1	comp212665_c1_seq1	NA	NOANNOT	NOREF	yes	yes
comp219954_c0	comp219954_c0_seq1	NA	NOANNOT	NOREF	yes	yes
comp220764_c0.0	comp220764_c0.0_seq1	NA	alpha/beta-Hydrolases superfamily protein	AT3G19970	yes	yes
comp221010_c0	comp221010_c0_seq2	MLO5, ATMLO5	Seven transmembrane MLO family protein	AT2G33670	yes	yes
comp221839_c0	comp221839_c0_seq1	PPI1	proton pump interactor 1	AT4G27500	yes	yes
comp223726_c0	comp223726_c0_seq1	NA	NOANNOT	NOREF	yes	yes
comp224043_c0	comp224043_c0_seq1	PLL4	poltergeist like 4	AT2G28890	yes	yes
comp225843_c0	comp225843_c0_seq3	NA	Major facilitator superfamily protein	AT3G13050	yes	yes
comp227315_c1	comp227315_c1_seq1	ATPDIL1-1, ATPDI5, PDI5, PDIL1-1	PDI-like 1-1	AT1G21750	yes	yes
comp227360_c4.0	comp227360_c4.0_seq2	NLA, BAH1	SPX (SYG1/Pho81/XPR1) domain-containing protein	AT1G02860	yes	yes
comp227849_c0.0	comp227849_c0.0_seq2	ATHXK1, GIN2, HXK1	hexokinase 1	AT4G29130	yes	yes
comp228426_c6.0	comp234756_c0_seq2	NA	Glycosyl hydrolase superfamily protein	AT2G27500	yes	yes
comp231232_c0	comp231232_c0_seq1	NA	Leucine-rich repeat protein kinase family protein	AT1G74360	yes	yes
comp233341_c2.0	comp233341_c2.0_seq1	NA	Chloroplast-targeted copper chaperone protein	AT2G28660	yes	yes
comp234216_c1.2	comp234216_c1.2_seq2	ATPK19, ATS6K2, S6K2, ATPK2	serine/threonine protein kinase 2	AT3G08720	yes	yes
comp234243_c1	comp234243_c1_seq2	EMB24, ATASP38, PCS1	Eukaryotic aspartyl protease family protein	AT5G02190	yes	yes
comp234411_c2.0	comp234411_c2.0_seq1	AAP3, ATAAP3	amino acid permease 3	AT1G77380	yes	yes
comp234756_c2.1	comp234756_c2.1_seq1	ELI3-1, ELI3, ATCAD7, CAD7	elicitor-activated gene 3-1	AT4G37980	yes	yes
comp234779_c1	comp234779_c1_seq1	CCR3, ATCRR3	CRINKLY4 related 3	AT3G55950	yes	yes
comp133201_c0.0	comp133201_c0.0_seq1	NA	DCD (Development and Cell Death) domain protein	AT5G42050	yes	yes
comp220911_c3	comp220911_c3_seq1	DND1, ATCNGC2, CNGC2	Cyclic nucleotide-regulated ion channel family protein	AT5G15410	yes	yes
comp231545_c2	comp231545_c2_seq1	CBL1, ATCBL1, SCABP5	calcineurin B-like protein 1	AT4G17615	yes	yes
comp233834_c0.0	comp233834_c0.0_seq30	AFC1, AME2, FC1	FUS3-complementing gene 1	AT3G53570	yes	yes
comp234621_c0.0	comp234621_c0.0_seq1	LRR XI-23, RLK7	Leucine-rich receptor-like protein kinase family protein	AT1G09970	yes	yes
comp200993_c0	comp200993_c0_seq1	NA	SBP (S-ribonuclease binding protein) family protein	AT3G12920	yes	no
comp234756_c0	comp234756_c0_seq1	NA	NOANNOT	NOREF	yes	no
comp214369_c1	comp214369_c1_seq1	NA	Protein kinase superfamily protein	AT3G09830	yes	no
comp215364_c0	comp215364_c0_seq1	NA	Target of Myb protein 1	AT1G21380	yes	no
comp233143_c1.1	comp233143_c1.1_seq14	CPK9	calmodulin-domain protein kinase 9	AT3G20410	yes	no
comp235398_c0	comp235398_c0_seq1	LHT1	lysine histidine transporter 1	AT5G40780	yes	no
comp196973_c0	comp196973_c0_seq1	SOBIR1, EVR	Leucine-rich repeat protein kinase family protein	AT2G31880	yes	no
comp226389_c3.1	comp226389_c3.1_seq1	CDF1	cycling DOF factor 1	AT5G62430	yes	no
comp232261_c0.2	comp232261_c0.2_seq3	NSL1	MAC/Perforin domain-containing protein	AT1G28380	yes	no
