# Supplementary material for: Venus flytrap carnivorous lifestyle builds on herbivore defense strategies
Source: HighWire-hosted journal article supplement (doi:10.1101/gr.202200.115), 2016-05-04
Supplement: Supplemental_Table_S15.xlsx [file Supplemental_Table_S15.xlsx]

## Sheet: Transportome
Up regulated in Insect-stimulated glands
Down regulated in Insect-stimulated glands
Unigene	Representative Isoform	TCDB ID	CRB Ortholog	Synonym	Description	Substrate	Substrate Class	Localization	Membrane
comp174413_c1	comp174413_c1_seq1	1.A.1	AT2G28260	ATCNGC15, CNGC15	cyclic nucleotide-gated channel 15	calcium	cation	secretory pathway	PM
comp220210_c1	comp220210_c1_seq1	1.A.1	AT2G26650	AKT1, ATAKT1, KT1	K transporter 1	potassium	cation	secretory pathway	PM
comp220911_c3	comp220911_c3_seq1	1.A.1	AT5G15410	DND1, ATCNGC2, CNGC2	Cyclic nucleotide-regulated ion channel family protein	calcium	cation	secretory pathway	PM
comp224321_c0.0	comp224321_c0.0_seq1	1.A.1	AT2G24610	ATCNGC14, CNGC14	cyclic nucleotide-gated channel 14	calcium	cation	secretory pathway	PM
comp173079_c0	comp173079_c0_seq1	1.A.11	AT1G64780	ATAMT1;2	ATAMT1	ammonia	nitrogen	secretory pathway	PM
comp205786_c0	comp205786_c0_seq5	1.A.12	AT3G09270	ATGSTU8, GSTU8	glutathione S-transferase TAU 8	anion	anion	secretory pathway	PM
comp232919_c0.0	comp232919_c0.0_seq2	1.A.35	AT1G16010	MGT2, MRS2-1	magnesium transporter 2	magnesium	cation	secretory pathway	VAC
comp220431_c1	comp220431_c1_seq3	1.A.35	AT5G09690	ATMGT7, MGT7, MRS2-7	magnesium transporter 7	magnesium	cation	secretory pathway	ER
comp232919_c0.2	comp232919_c0.2_seq1	1.A.35	At1g16010	AtMRS2-1/AtMGT2	magnesium transporter	magnesium	cation	secretory pathway	VAC
comp226953_c1.1	comp226953_c1.1_seq1	1.A.4	AT2G31820	NA	Ankyrin repeat family protein	nd	other	not assigned	ND
comp231916_c0.0	comp231916_c0.0_seq43	1.A.43	AT2G41705	NA	camphor resistance CrcB family protein	anion	anion	plastid	PT
comp213845_c0	comp213845_c0_seq2	1.A.56	AT2G26975	NA	Ctr copper transporter family	copper	metal	secretory pathway	PM
comp234339_c0.0	comp234339_c0.0_seq1	1.A.75	AT2G48060	NA	putative (animal Piezo)-like component of mechanosensitive cation channel	calcium	cation	secretory pathway	PM
comp233648_c0.0	comp233648_c0.0_seq4	1.A.77	AT2G23790	NA	Protein of unknown function (DUF607)	calcium	cation	mitochondria	MIT
comp222237_c0	comp222237_c0_seq1	1.A.8	AT4G19030	NA	NLM1, NIP1	water/glycerol	small solute	secretory pathway	PM
comp231218_c2	comp231218_c2_seq1	1.A.8	AT5G42630	ATPIP2.7	putative plasma membrane intrinsic protein 3a	water	small solute	secretory pathway	PM
comp211686_c0	comp211686_c0_seq1	1.A.87	AT2G45010	NA	PLAC8 family protein	calcium	cation	secretory pathway	ND
comp226761_c0	comp226761_c0_seq1	1.A.10	At2g29120	ATGLR2.7	putative GLR-type calcium cation-permeable channel	calcium	cation	secretory pathway	PM
comp227505_c0	comp227505_c0_seq4	1.C.40	At1g04970	NA	lipid-binding serum glycoprotein family protein	lipid transfer	lipid	secretory pathway	PM
comp133360_c0	comp133360_c0_seq1	2.A.1	AT5G45275	NA	Major facilitator superfamily protein	nd	other	secretory pathway	PM
comp217791_c0	comp217791_c0_seq1	2.A.1	AT1G74780	NA	Nodulin-like / Major Facilitator Superfamily protein	nd	other	secretory pathway	PM
comp222037_c0	comp222037_c0_seq1	2.A.1	AT4G16480	ATINT4, INT4	inositol transporter 4	carbohydrate	sugar	secretory pathway	PM
comp223365_c0.1	comp223365_c0.1_seq3	2.A.1	AT3G18830	ATPLT5, PMT5, ATPMT5	polyol/monosaccharide transporter 5	carbohydrate	sugar	secretory pathway	PM
comp224548_c0	comp224548_c0_seq2	2.A.1	AT1G75220	NA	Major facilitator superfamily protein	nd	other	not assigned	ND
comp225843_c0	comp225843_c0_seq3	2.A.1	AT3G13050	NiaP	Major facilitator superfamily protein	nicotinate	metabolite	secretory pathway	PM
comp233257_c0.1	comp233257_c0.1_seq1	2.A.1	AT3G20660	AtOCT4, 4-Oct	organic cation/carnitine transporter4	amine	metabolite	secretory pathway	VM
comp235481_c0	comp235481_c0_seq1	2.A.1	AT5G43350	NA	ATPT1, PHT1	phosphate	phosphate	secretory pathway	PM
comp90213_c0.1	comp90213_c0.1_seq1	2.A.1	AT5G26340	MSS1, STP13, ATSTP13	Major facilitator superfamily protein	carbohydrate	sugar	secretory pathway	PM
comp90405_c0	comp90405_c0_seq1	2.A.1	AT2G38940	NA	ATPT2, PHT1	phosphate	phosphate	secretory pathway	PM
comp207244_c0	comp207244_c0_seq1	2.A.1	AT2G20780	NA	Major facilitator superfamily protein	nd	other	plastid	PT
comp230459_c1	comp230459_c1_seq4	2.A.1	AT3G47420	ATPS3, PS3	phosphate starvation-induced gene 3	phosphate	phosphate	secretory pathway	PM
comp231334_c0.2	comp231334_c0.2_seq1	2.A.1	At4g02050	STP7	sugar transporter protein 7	carbohydrate	sugar	secretory pathway	PM
comp222928_c0	comp222928_c0_seq2	2.A.106	AT1G25520	NA	Uncharacterized protein family (UPF0016)	nd	other	not assigned	ND
comp234220_c1	comp234220_c1_seq1	2.A.106	AT1G25520	NA	Uncharacterized protein family (UPF0016)	nd	other	not assigned	ND
comp229993_c0	comp229993_c0_seq2	2.A.12	AT1G80300	NTT1, ATNTT1	nucleotide transporter 1	nucleotide	nucleotide	plastid	PT
comp90386_c0	comp90386_c0_seq1	2.A.123	AT1G21460	SWEET1, AtSWEET1	Nodulin MtN3 family protein	carbohydrate	sugar	secretory pathway	PM
comp210794_c0	comp210794_c0_seq1	2.A.17	AT3G54140	ATPTR1, PTR1	peptide transporter 1	peptide	nitrogen	secretory pathway	PM
comp219720_c0.0	comp219720_c0.0_seq1	2.A.17	AT3G54140	ATPTR1, PTR1	peptide transporter 1	peptide	nitrogen	secretory pathway	PM
comp221959_c0	comp221959_c0_seq1	2.A.17	AT5G46040	AtNPF5.3	Major facilitator superfamily protein	nd	other	not assigned	ND
comp221959_c1	comp221959_c1_seq1	2.A.17	AT5G46050	ATPTR3, PTR3	peptide transporter 3	peptide	nitrogen	not assigned	ND
comp231151_c1	comp231151_c1_seq2	2.A.17	AT2G26690	AtNPF6.2/AtNRT1.4	Major facilitator superfamily protein	nitrate	nitrogen	secretory pathway	PM
comp233140_c0	comp233140_c0_seq15	2.A.17	At1g68570	AtNPF3.1/AtNitr1	putative NRT1/PTR subfamily NPF3 nitrite transporter	nitrate/nitrite	nitrogen	secretory pathway	PM
comp199059_c0	comp199059_c0_seq1	2.A.18	AT4G38250	NA	Transmembrane amino acid transporter family protein	amino acid	nitrogen	not assigned	ND
comp227236_c0	comp227236_c0_seq3	2.A.18	AT2G39890	PROT1, ATPROT1	proline transporter 1	amino acid	nitrogen	secretory pathway	PM
comp234411_c2.0	comp234411_c2.0_seq1	2.A.18	AT1G77380	AAP3, ATAAP3	amino acid permease 3	amino acid	nitrogen	secretory pathway	PM
comp230493_c1.2	comp230493_c1.2_seq13	2.A.18	AT1G08230	AtGAT1	Transmembrane amino acid transporter family protein	amino acid	nitrogen	secretory pathway	PM
comp232569_c1	comp232569_c1_seq1	2.A.18	AT3G30390	NA	Transmembrane amino acid transporter family protein	amino acid	nitrogen	not assigned	ND
comp231184_c1	comp231184_c1_seq39	2.A.19	AT1G54115	ATCCX4, CCX4	cation calcium exchanger 4	calcium	cation	secretory pathway	EN
comp170593_c0	comp170593_c0_seq2	2.A.29	AT2G39970	NA	Mitochondrial substrate carrier family protein	nd	other	mitochondria	MT
comp189181_c1	comp189181_c1_seq1	2.A.29	AT5G13490	AAC2	ADP/ATP carrier 2	nucleotide	nucleotide	mitochondria	MT
comp204376_c1	comp204376_c1_seq1	2.A.29	AT1G74240	NA	Mitochondrial substrate carrier family protein	nd	other	mitochondria	MT
comp224339_c0	comp224339_c0_seq1	2.A.29	AT1G25380	ATNDT2, NDT2	NAD transporter 2	nucleotide	nucleotide	mitochondria	MT
comp229866_c0.0	comp229866_c0.0_seq1	2.A.29	AT2G47490	ATNDT1, NDT1	NAD transporter 1	nucleotide	nucleotide	plastid	PT
comp219159_c0.0	comp219159_c0.0_seq6	2.A.29	AT3G20240	NA	Mitochondrial substrate carrier family protein	nd	other	mitochondria	MT
comp215480_c0	comp215480_c0_seq2	2.A.29	AT5G46800	BOU	Mitochondrial substrate carrier family protein	nd	other	mitochondria	MT
comp134593_c0.0	comp134593_c0.0_seq1	2.A.3	AT5G05630	AtLAT1/AtRMV1	Amino acid permease family protein	amine	metabolite	secretory pathway	PM
comp134593_c2	comp134593_c2_seq1	2.A.3	AT1G31830	AtLAT4/AtPAR1	Amino acid permease family protein	amine	metabolite	secretory pathway	PM
comp228048_c0	comp228048_c0_seq1	2.A.3	AT1G58030	CAT2	cationic amino acid transporter 2	amino acid	nitrogen	secretory pathway	VM
comp231832_c0.0	comp231832_c0.0_seq2	2.A.3	AT2G01170	AtBAT1/AtGABP	bidirectional amino acid transporter 1	amino acid	nitrogen	mitochondria	MT
comp218404_c1	comp218404_c1_seq1	2.A.30	AT1G30450	CCC1, ATCCC1, HAP5	cation-chloride co-transporter 1	anion	anion	secretory pathway	PM
comp232123_c2	comp232123_c2_seq1	2.A.37	At4g00630	KEA2	K efflux antiporter 2	potassium	cation	plastid	PT
comp231307_c4.1	comp231307_c4.1_seq3	2.A.38	AT4G10310	HKT1, ATHKT1	high-affinity K transporter 1	sodium	cation	secretory pathway	PM
comp210293_c0	comp210293_c0_seq1	2.A.4	AT2G46800	ZAT, ATMTP1, MTP1, ZAT1, ATCDF1	zinc transporter of Arabidopsis thaliana	metal	metal	secretory pathway	VM
comp226151_c3.0	comp226151_c3.0_seq1	2.A.4	AT3G58060	AtMTP8/AtMTPc3	Cation efflux family protein	metal	metal	secretory pathway	EN
comp230400_c2	comp230400_c2_seq2	2.A.40	AT2G27810	ATNAT12, NAT12	nucleobase-ascorbate transporter 12	nucleobase	metabolite	secretory pathway	PM
comp214625_c0.0	comp214625_c0.0_seq1	2.A.49	AT5G49890	CLC-C, ATCLC-C	chloride channel C	anion	anion	secretory pathway	VM
comp187162_c0	comp187162_c0_seq3	2.A.5	At1g10970	ATZIP4	metal transporter	metal	metal	secretory pathway	PM
comp226037_c3	comp226037_c3_seq5	2.A.5	AT1G60960	IRT3, ATIRT3	iron regulated transporter 3	metal	metal	secretory pathway	PM
comp232836_c0.0	comp232836_c0.0_seq1	2.A.5	AT3G08650	ZIP13	ZIP metal ion transporter family	metal	metal	secretory pathway	PM
comp200372_c0.0	comp200372_c0.0_seq1	2.A.53	AT2G25680	MOT1	molybdate transporter 1	metal	metal	secretory pathway	PM
comp224756_c0	comp224756_c0_seq1	2.A.53	AT3G15990	ATSULTR3.4	SULTR3	sulfate	anion	secretory pathway	PM
comp225830_c0.0	comp225830_c0.0_seq1	2.A.55	AT1G47240	NRAMP2, ATNRAMP2	NRAMP metal ion transporter 2	metal	metal	secretory pathway	EN
comp233623_c0	comp233623_c0_seq8	2.A.55	AT1G15960	NRAMP6, ATNRAMP6	NRAMP metal ion transporter 6	metal	metal	secretory pathway	EN
comp229834_c0	comp229834_c0_seq1	2.A.57	AT4G05120	ENT3, FUR1, ATENT3	Major facilitator superfamily protein	nucleoside	nitrogen	secretory pathway	PM
comp206906_c0	comp206906_c0_seq1	2.A.66	AT1G15170	ATDTX12	MATE efflux family protein	metal	metal	secretory pathway	PM
comp229004_c1	comp229004_c1_seq2	2.A.66	AT1G51340	ATMATE, ATDTX42, ATFRDL	MATE efflux family protein	anion	anion	secretory pathway	PM
comp204242_c0	comp204242_c0_seq3	2.A.66	AT3G59030	TT12, ATTT12, ATDTX41	MATE efflux family protein	flavonoid	metabolite	secretory pathway	VM
comp207938_c0	comp207938_c0_seq1	2.A.66	AT5G38030	ATDTX30	MATE efflux family protein	nd	other	secretory pathway	PM
comp218251_c0	comp218251_c0_seq2	2.A.66	AT1G47530	ATDTX33	MATE efflux family protein	nd	other	not assigned	ND
comp227701_c3	comp227701_c3_seq1	2.A.66	AT5G52450	ATDTX16	MATE efflux family protein	nd	other	not assigned	ND
comp233920_c0.0	comp233920_c0.0_seq7	2.A.66	AT3G23560	ALF5	MATE efflux family protein	metal	metal	secretory pathway	PM
comp207545_c0	comp207545_c0_seq1	2.A.67	AT3G27020	ATYSL6	YELLOW STRIPE like 6	metal	metal	secretory pathway	EN
comp225114_c0	comp225114_c0_seq6	2.A.67	AT4G27730	ATOPT6, OPT6	oligopeptide transporter	gluthathione	metabolite	secretory pathway	PM
comp227461_c0.1	comp227461_c0.1_seq2	2.A.69	AT1G71090	ATPILS2	Auxin efflux carrier family protein	auxin	hormone	secretory pathway	EN
comp233129_c3.1	comp233129_c3.1_seq4	2.A.69	AT1G76520	ATPILS1	Auxin efflux carrier family protein	auxin	hormone	secretory pathway	EN
comp167080_c0	comp167080_c0_seq1	2.A.7	AT1G14360	ATUTR3, UTR3	UDP-galactose transporter 3	nucleotide-sugar	sugar	secretory pathway	EN
comp210555_c0	comp210555_c0_seq2	2.A.7	AT1G21070	NA	Nucleotide-sugar transporter family protein	nucleotide-sugar	sugar	secretory pathway	EN
comp222663_c2.0	comp222663_c2.0_seq3	2.A.7	AT5G54800	GPT1, ATGPT1	glucose 6-phosphate/phosphate translocator 1	phosphate	phosphate	plastid	PT
comp222969_c0.0	comp222969_c0.0_seq3	2.A.7	AT4G32140	NA	EamA-like transporter family	nd	other	not assigned	ND
comp227694_c2.2	comp227694_c2.2_seq4	2.A.7	AT2G03530	UPS2, ATUPS2	ureide permease 2	nucleobase	nitrogen	secretory pathway	PM
comp229118_c0.1	comp229118_c0.1_seq40	2.A.7	AT4G32272	NA	Nucleotide/sugar transporter family protein	nucleotide-sugar	nucleotide	not assigned	ND
comp229956_c1	comp229956_c1_seq5	2.A.7	AT3G59360	UTR6, ATUTR6	UDP-galactose transporter 6	nucleotide-sugar	sugar	secretory pathway	EN
comp233228_c0.1	comp233228_c0.1_seq1	2.A.7	AT5G54800	GPT1, ATGPT1	glucose 6-phosphate/phosphate translocator 1	phosphate	phosphate	plastid	PT
comp215050_c0	comp215050_c0_seq1	2.A.7	At4g18220	AtPUP9	putative purine permease	nucleobase	nitrogen	secretory pathway	PM
comp226581_c2.1	comp226581_c2.1_seq2	2.A.7	At4g18210	AtPUP10	putative purine permease	nucleobase	nitrogen	secretory pathway	PM
comp231490_c1	comp231490_c1_seq3	2.A.7	AT2G37460	NA	nodulin MtN21 /EamA-like transporter family protein	nd	other	not assigned	ND
comp234737_c1.2	comp234737_c1.2_seq3	2.A.7	NOREF	NA	NOANNOT	nd	other	not assigned	ND
comp224585_c0.0	comp224585_c0.0_seq1	2.A.7	AT4G38730	NA	Protein of unknown function (DUF803)	nd	other	secretory pathway	EN
comp228577_c1.0	comp228577_c1.0_seq8	2.A.7	AT3G59310	NA	Eukaryotic protein of unknown function (DUF914)	nd	other	secretory pathway	EN
comp227066_c0.0	comp227066_c0.0_seq4	2.A.71	AT1G64890	NA	Major facilitator superfamily protein	folate-biopterin	metabolite	mitochondria	MT
comp199544_c0	comp199544_c0_seq1	2.A.71	AT5G25050	NA	Major facilitator superfamily protein	nd	other	secretory pathway	EN
comp218853_c0.0	comp218853_c0.0_seq1	2.A.71	AT5G54860	NA	Major facilitator superfamily protein	nd	other	secretory pathway	PM
comp217444_c1	comp217444_c1_seq1	2.A.72	AT4G13420	HAK5, ATHAK5	high affinity K transporter 5	potassium	cation	secretory pathway	PM
comp226726_c0	comp226726_c0_seq6	2.A.72	AT4G13420	HAK5, ATHAK5	high affinity K transporter 5	potassium	cation	secretory pathway	PM
comp186974_c0	comp186974_c0_seq1	2.A.72	NOREF	NA	NOANNOT	potassium	cation	not assigned	ND
comp210501_c0	comp210501_c0_seq11	2.A.72	NOREF	NA	NOANNOT	potassium	cation	not assigned	ND
comp224851_c0.0	comp224851_c0.0_seq4	2.A.72	NOREF	NA	NOANNOT	potassium	cation	not assigned	ND
comp228090_c0.0	comp228090_c0.0_seq1	2.A.72	NOREF	NA	NOANNOT	potassium	cation	not assigned	ND
comp228090_c1.0	comp228090_c1.0_seq7	2.A.72	AT5G49320	NA	Protein of unknown function (DUF1218)	potassium	cation	not assigned	ND
comp229486_c0.1	comp229486_c0.1_seq2	2.A.72	AT1G60160	AtKUP12/AtHAK12/AtKT12)	Potassium transporter family protein	potassium	cation	secretory pathway	PM
comp229486_c1	comp229486_c1_seq1	2.A.72	AT1G60160	AtKUP12/AtHAK12/AtKT12)	Potassium transporter family protein	potassium	cation	secretory pathway	PM
comp217928_c0.1	comp217928_c0.1_seq1	2.A.82	AT1G77220	NA	Protein of unknown function (DUF300)	nd	other	secretory pathway	EN
comp227501_c2.0	comp227501_c2.0_seq1	2.A.85	NOREF	NA	NOANNOT	nd	other	not assigned	ND
comp168878_c0	comp168878_c0_seq1	2.A.89	AT3G43660	NA	Vacuolar iron transporter (VIT) family protein	metal	metal	secretory pathway	VM
comp208713_c0.0	comp208713_c0.0_seq2	2.A.92	AT1G25500	NA	Plasma-membrane choline transporter family protein	choline	metabolite	secretory pathway	PM
comp219642_c0	comp219642_c0_seq2	2.A.92	AT4G38640	NA	Plasma-membrane choline transporter family protein	choline	metabolite	secretory pathway	PM
comp229424_c0.0	comp229424_c0.0_seq1	2.A.93	AT3G56160	NA	Sodium Bile acid symporter family	nd	other	plastid	PT
comp210319_c1	comp210319_c1_seq1	3.A.1	AT1G17840	WBC11, ABCG11, DSO, COF1, ATWBC11	white-brown complex homolog protein 11	lipid	lipid	secretory pathway	PM
comp220150_c0	comp220150_c0_seq1	3.A.1	AT4G39850	AtABCD1/AtPMP2/AtPXA1/AtCTS/AtPED3	peroxisomal ABC transporter 1	lipid	lipid	secretory pathway	EN
comp224639_c0	comp224639_c0_seq1	3.A.1	AT3G13080	ATMRP3, MRP3, ABCC3	multidrug resistance-associated protein 3	PC-Al	metal	secretory pathway	PM
comp228139_c0.0	comp228139_c0.0_seq1	3.A.1	AT3G59140	ATMRP14, MRP14, ABCC10	multidrug resistance-associated protein 14	nd	other	secretory pathway	PM
comp229404_c1	comp229404_c1_seq2	3.A.1	AT5G39040	AtABCB27, ALS1, ATTAP2, TAP2	transporter associated with antigen processing protein 2	PC-Al	metal	not assigned	ND
comp229694_c0.0	comp229694_c0.0_seq2	3.A.1	AT3G28345	AtABCB15/AtMDR13/AtPGP15	ABC transporter family protein	auxin	hormone	secretory pathway	PM
comp233309_c0.0	comp233309_c0.0_seq12	3.A.1	AT4G18050	PGP9, AtABCB9/AtMDR9	P-glycoprotein 9	nd	other	not assigned	ND
comp234560_c0.0	comp234560_c0.0_seq1	3.A.1	AT1G15520	PDR12, ATPDR12, ABCG40, ATABCG40	pleiotropic drug resistance 12	ABA-uptake	hormone	secretory pathway	PM
comp216694_c1	comp216694_c1_seq1	3.A.1	NOREF	NA	NOANNOT	nd	other	not assigned	ND
comp216694_c2.0	comp216694_c2.0_seq4	3.A.1	NOREF	NA	NOANNOT	nd	other	not assigned	ND
comp216694_c3	comp216694_c3_seq1	3.A.1	NOREF	NA	NOANNOT	nd	other	not assigned	ND
comp221757_c2	comp221757_c2_seq1	3.A.1	AT1G71960	ABCG25, ATABCG25	ATP-binding casette family G25	ABA-export	hormone	secretory pathway	PM
comp222046_c0	comp222046_c0_seq1	3.A.1	AT1G53390	NA	P-loop containing nucleoside triphosphate hydrolases superfamily protein	nd	other	secretory pathway	PM
comp233383_c1.0	comp233383_c1.0_seq3	3.A.1	NOREF	NA	NOANNOT	nd	other	not assigned	ND
comp234250_c1	comp234250_c1_seq1	3.A.1	AT3G55090	AtABCG16/AtWBC16	ABC-2 type transporter family protein	nd	other	secretory pathway	PM
comp231565_c1.0	comp231565_c1.0_seq37	3.A.1	AT1G02520	PGP11	P-glycoprotein 11	auxin	hormone	secretory pathway	PM
comp234728_c4	comp234728_c4_seq12	3.A.1	At1g31770	AtABCG14/AtWBC14	putative ABC-type transporter involved in cytokinin translocation	cytokinin	hormone	secretory pathway	PM
comp205736_c1	comp205736_c1_seq1	3.A.10	AT1G16780	NA	VHP2	H+-pump	cation	secretory pathway	VM
comp213325_c0	comp213325_c0_seq1;2	3.A.2	AT1G19910	AVA-P2, AVA-2PE, ATVHA-C2	ATPase, F0/V0 complex, subunit C protein	H+-pump	cation	secretory pathway	VM
comp225962_c0	comp225962_c0_seq1	3.A.2	AT4G39080	VHA-A3	vacuolar proton ATPase A3	H+-pump	cation	secretory pathway	VM
comp217856_c0	comp217856_c0_seq1	3.A.3	AT1G63440	HMA5	heavy metal atpase 5	metal-pump	metal	secretory pathway	PM
comp220679_c0	comp220679_c0_seq1	3.A.3	AT1G07810	ECA1, ATECA1, ACA3	ER-type Ca2+ATPase 1	ca2+-pump	cation	secretory pathway	EN
comp228088_c0.0	comp228088_c0.0_seq1	3.A.3	AT5G23630	PDR2, MIA	phosphate deficiency response 2	cation-pump	cation	secretory pathway	EN
comp229908_c0	comp229908_c0_seq1	3.A.3	AT5G44790	RAN1, HMA7	copper-exporting ATPase / responsive-to-antagonist 1 / copper-transporting ATPase (RAN1)	metal-pump	metal	secretory pathway	EN
comp231270_c0.0	comp231270_c0.0_seq2	3.A.3	AT4G33520	PAA1, HMA6	P-type ATP-ase 1	metal-pump	metal	secretory pathway	EN
comp232952_c0	comp232952_c0_seq2	3.A.3	AT1G68710	NA	ATPase E1-E2 type family protein / haloacid dehalogenase-like hydrolase family protein	lipid-pump	lipid	not assigned	ND
comp232985_c1	comp232985_c1_seq1	3.A.3	AT3G57330	ACA11	autoinhibited Ca2+ATPase 11	ca2+-pump	cation	secretory pathway	EN
comp234095_c1.1	comp234095_c1.1_seq9	3.A.3	AT2G18960	AHA1, PMA, OST2, HA1	H()-ATPase 1	H+-pump	cation	secretory pathway	PM
comp192003_c1	comp192003_c1_seq1	3.A.3	At1g68710	ATALA9	putative aminophospholipid translocase, P4-type ATPase	ca2+-pump	cation	secretory pathway	EN
comp232597_c0.0	comp232597_c0.0_seq11	3.A.3	AT1G07670	ATECA4, ECA4	endomembrane-type CA-ATPase 4	ca2+-pump	cation	secretory pathway	EN
comp211685_c0	comp211685_c0_seq1	5.B.1	AT5G51060	AtrbohC/AtRHD2	respiratory burst oxidase homologue D	electron	other	secretory pathway	PM
comp213152_c0	comp213152_c0_seq1	1.A.1	AT3G02850	SKOR	STELAR K outward rectifier	potassium	cation	secretory pathway	PM
comp220323_c1	comp220323_c1_seq4	1.A.1	AT5G55630	KCO1, TPK1, ATKCO1, ATTPK1	Outward rectifying potassium channel protein	potassium	cation	secretory pathway	VM
comp230753_c2.1	comp230753_c2.1_seq	1.A.1	AT5G43745	CASTOR	Protein of unknown function (DUF1012)	potassium	cation	secretory pathway	EN
comp230889_c0.0	comp230889_c0.0_seq3	1.A.10	AT3G51480	ATGLR3.6, GLR3.6	glutamate receptor 3.6	calcium	cation	secretory pathway	PM
comp168791_c1	comp168791_c1_seq1	1.A.12	AT3G62760	ATGSTF13	Glutathione S-transferase family protein	anion	anion	secretory pathway	PM
comp233587_c1.1	comp233587_c1.1_seq2	1.A.17	AT1G73020	NA	Anoctamin-type calcium-activated anion channel	anion	anion	secretory pathway	PM
comp233587_c2.2	comp233587_c2.2_seq1	1.A.17	AT1G73020	NA	Anoctamin-type calcium-activated anion channel	anion	anion	secretory pathway	PM
comp234238_c2.0	comp234238_c2.0_seq4	1.A.23	AT4G00290	NA	Mechanosensitive ion channel protein	anion	anion	mitochondria	MT
comp232392_c2	comp232392_c2_seq1	1.A.23	NOREF	NA	NOANNOT		other	not assigned	ND
comp224947_c0	comp224947_c0_seq3	1.A.46	AT3G61320	NA	Bestrophin-like protein	anion	anion	plastid	PT
comp230145_c0.0	comp230145_c0.0_seq1	1.A.47	AT5G62290	NA	nucleotide-sensitive chloride conductance regulator (ICln) family protein	anion	anion	not assigned	ND
comp224802_c0	comp224802_c0_seq1	1.A.56	AT5G20650	COPT5	copper transporter 5	metal	metal	secretory pathway	VM
comp200845_c0	comp200845_c0_seq1	1.A.77	AT1G57610	NA	Protein of unknown function (DUF607)	nd	other	mitochondria	MT
comp188537_c0.1	comp188537_c0.1_seq1	1.A.8	AT4G00430	ATPIP1;4	TMP-C, PIP1	water	small solute	secretory pathway	PM
comp221328_c0.0	comp221328_c0.0_seq2	1.A.8	AT4G18910	AtNIP1.2/AtNLM2	NOD26-like intrinsic protein	water/glycerol	small solute	not assigned	ND
comp222404_c0.1	comp222404_c0.1_seq3	1.A.8	AT2G36830	ATTIP1;1	GAMMA-TIP, TIP1	water	small solute	secretory pathway	VM
comp234808_c2.2	comp234808_c2.2_seq2	1.A.8	AT4G10380	AtNIP5.1/AtNLM6	NIP5	urea	small solute	secretory pathway	PM
comp90016_c0.0	comp90016_c0.0_seq1	1.A.8	AT2G36830	ATTIP1;1	GAMMA-TIP, TIP1	water	small solute	secretory pathway	VM
comp209722_c0	comp209722_c0_seq1	1.B.69	AT1G34630	NA	Tim17/Tim22/Tim23 family protein (TAIR:AT5G51150.1)	nd	other	plastid	PT
comp188639_c0.1	comp188639_c0.1_seq1	2.A.1	AT5G14570	ATNRT2.7, NRT2.7	high affinity nitrate transporter 2.7	nitrate	nitrogen	secretory pathway	VM
comp188646_c0	comp188646_c0_seq1	2.A.1	AT4G00370	NA	ANTR2, PHT4	ascorbate	metabolite	plastid	PT
comp218333_c0	comp218333_c0_seq1	2.A.1	AT4G27720	NA	Major facilitator superfamily protein	nd	other	secretory pathway	EN
comp222570_c0	comp222570_c0_seq1	2.A.1	AT5G16150	GLT1, PGLCT	plastidic GLC translocator	carbohydrate	sugar	plastid	PT
comp225658_c0	comp225658_c0_seq1	2.A.1	AT4G22990	NA	Major Facilitator Superfamily with SPX (SYG1/Pho81/XPR1) domain-containing protein	nd	other	mitochondria	MT
comp228573_c0	comp228573_c0_seq1	2.A.1	AT2G16990	NA	Major facilitator superfamily protein	nd	other	secretory pathway	EN
comp228644_c0.0	comp228644_c0.0_seq1	2.A.1	AT2G29650	NA	ANTR1, PHT4	phosphate	phosphate	plastid	PT
comp229088_c0	comp229088_c0_seq1	2.A.1	AT1G18010	NA	Major facilitator superfamily protein	nd	other	secretory pathway	EN
comp231286_c0	comp231286_c0_seq1	2.A.1	AT1G12940	ATNRT2.5, NRT2.5	nitrate transporter2.5	nitrate	nitrogen	secretory pathway	PM
comp231420_c1	comp231420_c1_seq2	2.A.1	AT5G64500	NA	Major facilitator superfamily protein	nd	other	secretory pathway	EN
comp133577_c0	comp133577_c0_seq1	2.A.1	AT4G34950	NA	Major facilitator superfamily protein	nd	other	plastid	PT
comp220391_c1.0	comp220391_c1.0_seq1	2.A.1	AT3G46980	NA	AtPHT4;3/AtANTR4	phosphate	phosphate	plastid	PT
comp221968_c0.0	comp221968_c0.0_seq25	2.A.1	AT3G13050	NA	Major facilitator superfamily protein	nicotinate	metabolite	secretory pathway	EN
comp228392_c1.0	comp228392_c1.0_seq1	2.A.1	NOREF	NA	NOANNOT	nd	other	not assigned	ND
comp233424_c1.0	comp233424_c1.0_seq1	2.A.1	AT2G48020	NA	Major facilitator superfamily protein	metal	metal	secretory pathway	VM
comp228586_c1.3	comp228586_c1.3_seq14	2.A.106	AT1G64150	NA	Uncharacterized protein family (UPF0016)	nd	other	plastid	PT
comp89968_c0.0	comp89968_c0.0_seq1	2.A.106	AT4G13590	NA	Uncharacterized protein family (UPF0016)	nd	other	plastid	PT
comp234891_c1.0	comp234891_c1.0_seq1	2.A.12	AT5G05310	NA	TLC ATP/ADP transporter	nd	other	secretory pathway	EN
comp200598_c0	comp200598_c0_seq1	2.A.17	AT5G62680	AtNPF2.11/AtGTR2/AtNRT1.10	Major facilitator superfamily protein	glucosinolate	metabolite	secretory pathway	PM
comp218299_c0.0	comp218299_c0.0_seq1	2.A.17	AT1G69870	NRT1.7	nitrate transporter 1.7	nitrate	nitrogen	secretory pathway	PM
comp225514_c0	comp225514_c0_seq1	2.A.17	AT2G40460	ATNPF5.1	Major facilitator superfamily protein	peptide	nitrogen	not assigned	ND
comp228831_c1	comp228831_c1_seq1	2.A.17	AT5G62680	AtNPF2.11/AtGTR2/AtNRT1.10	Major facilitator superfamily protein	glucosinolate	metabolite	secretory pathway	PM
comp230369_c1	comp230369_c1_seq1	2.A.17	AT1G52190	AtNPF1.2/AtNRT1.11	Major facilitator superfamily protein	nitrate	nitrogen	secretory pathway	PM
comp220055_c0	comp220055_c0_seq2	2.A.17	AT1G22540	ATNPF5.10	Major facilitator superfamily protein	nitrate	nitrogen	secretory pathway	PM
comp169128_c0	comp169128_c0_seq1	2.A.18	AT2G38120	AUX1, WAV5, PIR1, MAP1	Transmembrane amino acid transporter family protein	auxin	hormone	secretory pathway	PM
comp195735_c0	comp195735_c0_seq7	2.A.18	NOREF	NA	NOANNOT	nd	other	not assigned	ND
comp235398_c0	comp235398_c0_seq1	2.A.18	AT5G40780	LHT1	lysine histidine transporter 1	amino acid	nitrogen	secretory pathway	PM
comp221045_c0	comp221045_c0_seq7	2.A.18	NOREF	NA	NOANNOT	nd	other	not assigned	ND
comp229178_c1.0	comp229178_c1.0_seq21	2.A.18	AT3G30390	NA	Transmembrane amino acid transporter family protein	nd	other	not assigned	ND
comp233880_c3.0	comp233880_c3.0_seq1	2.A.18	AT5G41800	NA	Transmembrane amino acid transporter family protein	nd	other	not assigned	ND
comp231198_c0	comp231198_c0_seq14	2.A.19	AT2G47600	ATMHX, MHX1, ATMHX1, MHX	magnesium/proton exchanger	metal	metal	secretory pathway	VM
comp233648_c1.0	comp233648_c1.0_seq4	2.A.19	AT1G53210	NA	sodium/calcium exchanger family protein / calcium-binding EF hand family protein	cation	cation	secretory pathway	PM
comp203841_c0	comp203841_c0_seq1	2.A.2	AT1G22710	SUC2, SUT1, ATSUC2	sucrose-proton symporter 2	carbohydrate	sugar	secretory pathway	PM
comp210262_c0	comp210262_c0_seq1	2.A.2	AT1G09960	SUT4, ATSUT4, SUC4, ATSUC4	sucrose transporter 4	carbohydrate	sugar	secretory pathway	VM
comp206375_c0	comp206375_c0_seq1	2.A.28	AT2G26900	AtBAT1/AtBASS2/AtSBF1	Sodium Bile acid symporter family	pyruvate	metabolite	plastid	PT
comp218012_c0	comp218012_c0_seq1	2.A.28	AT3G25410	AtBAT3/AtBASS3	Sodium Bile acid symporter family	nd	other	plastid	PT
comp187702_c0	comp187702_c0_seq1	2.A.29	AT3G51870	AtPAPST2	Mitochondrial substrate carrier family protein	nucleotide	metabolite	mitochondria	MT
comp225593_c0	comp225593_c0_seq9	2.A.29	AT2G33820	ATMBAC1, MBAC1	Mitochondrial substrate carrier family protein	amino acid	nitrogen	mitochondria	MT
comp223588_c0	comp223588_c0_seq1	2.A.3	AT3G19553	NA	Amino acid permease family protein	nd	other	secretory pathway	EN
comp230752_c2.2	comp230752_c2.2_seq3	2.A.3	AT2G01170	BAT1	bidirectional amino acid transporter 1	amino acid	nitrogen	mitochondria	MT
comp224666_c0.0	comp224666_c0.0_seq19	2.A.37	AT2G13620	ATCHX15, CHX15	cation/hydrogen exchanger 15	cation	cation	not assigned	ND
comp215429_c0.0	comp215429_c0.0_seq1	2.A.4	AT2G47830	AtMTP6/AtMTPc1	Cation efflux family protein	metal	metal	plastid	PT
comp229669_c6	comp229669_c6_seq2	2.A.4	AT2G39450	MTP11, ATMTP11	Cation efflux family protein	metal	metal	secretory pathway	EN
comp134766_c0	comp134766_c0_seq1	2.A.40	AT4G38050	AtNAT11	Xanthine/uracil permease family protein	nucleobase	metabolite	not assigned	ND
comp222135_c0	comp222135_c0_seq1	2.A.40	AT5G62890	AtNAT6	Xanthine/uracil permease family protein	nucleobase	metabolite	not assigned	ND
comp222572_c0.0	comp222572_c0.0_seq8	2.A.40	AT2G26510	PDE135, AtNAT3	Xanthine/uracil permease family protein	nucleobase	metabolite	plastid	PT
comp234272_c0.0	comp234272_c0.0_seq8	2.A.40	AT5G50300	AZG2, ATAZG2	Xanthine/uracil permease family protein	nucleobase	metabolite	secretory pathway	PM
comp225694_c4.0	comp225694_c4.0_seq1	2.A.47	AT5G64290	DCT, DIT2.1	dicarboxylate transport 2.1	anion	metabolite	plastid	PT
comp233941_c1	comp233941_c1_seq1	2.A.47	AT5G12860	DiT1	dicarboxylate transporter 1	anion	metabolite	plastid	PT
comp228758_c1.0	comp228758_c1.0_seq1	2.A.49	AT4G35440	CLC-E	chloride channel E	anion	anion	plastid	PT
comp218192_c0	comp218192_c0_seq1	2.A.5	AT2G30080	ZIP6, ATZIP6	ZIP metal ion transporter family	metal	metal	secretory pathway	EN
comp220628_c1	comp220628_c1_seq13	2.A.5	AT1G55910	ZIP11	zinc transporter 11 precursor	nd	other	secretory pathway	PM
comp229535_c1	comp229535_c1_seq1	2.A.55	AT5G03280	EIN2, PIR2, CKR1, ERA3, ORE3, ORE2, ATEIN2	NRAMP metal ion transporter family protein	metal	metal	secretory pathway	EN
comp231671_c1.2	comp231671_c1.2_seq1	2.A.57	AT1G70330	ENT1,AT, ENT1	equilibrative nucleotide transporter 1	nucleotide	nucleotide	secretory pathway	PM
comp170014_c0	comp170014_c0_seq1	2.A.66	AT5G65380	AtDTX27	MATE efflux family protein	nd	other	not assigned	ND
comp206153_c0	comp206153_c0_seq2	2.A.66	AT4G38380	AtDTX45	MATE efflux family protein	nd	other	plastid	PT
comp219314_c0	comp219314_c0_seq1	2.A.66	AT5G65380	AtDTX27	MATE efflux family protein	nd	other	not assigned	ND
comp230762_c0.0	comp230762_c0.0_seq4	2.A.66	AT2G38330	AtDTX44	MATE efflux family protein	nd	other	plastid	PT
comp230472_c1.2	comp230472_c1.2_seq14	2.A.66	AT3G26590	ATDTX29	MATE efflux family protein	nd	other	not assigned	ND
comp214897_c2	comp214897_c2_seq1	2.A.67	AT5G55930	ATOPT1, OPT1	oligopeptide transporter 1	nd	other	not assigned	ND
comp221384_c3	comp221384_c3_seq3	2.A.67	AT4G27730	ATOPT6, OPT6	oligopeptide transporter 1	gluthathione	metabolite	secretory pathway	PM
comp229453_c0	comp229453_c0_seq1	2.A.67	AT5G64410	ATOPT4, OPT4	oligopeptide transporter 4	nd	other	secretory pathway	PM
comp234994_c0.2	comp234994_c0.2_seq4	2.A.67	AT4G10770	ATOPT7, OPT7	oligopeptide transporter 7	nd	other	secretory pathway	PM
comp222883_c1	comp222883_c1_seq2	2.A.69	AT1G70940	PIN3, ATPIN3	Auxin efflux carrier family protein	auxin	hormone	secretory pathway	PM
comp216763_c0	comp216763_c0_seq1	2.A.69	AT1G71090	AtPILS2	Auxin efflux carrier family protein	auxin	hormone	secretory pathway	EN
comp207536_c0	comp207536_c0_seq3	2.A.7	AT3G01550	ATPPT2, PPT2	phosphoenolpyruvate (pep)/phosphate translocator 2	pep-phosphate	metabolite	plastid	PT
comp217015_c0	comp217015_c0_seq1	2.A.7	AT1G71900	NA	Protein of unknown function (DUF803)	nd	other	not assigned	ND
comp217420_c0	comp217420_c0_seq1	2.A.7	AT1G12500	AtKVAG1	Nucleotide-sugar transporter family protein	nucleotide	nucleotide	plastid	PT
comp222797_c1	comp222797_c1_seq2	2.A.7	AT5G46110	APE2, TPT	Glucose-6-phosphate/phosphate translocator-related	g6p-phosphate	metabolite	plastid	PT
comp228861_c2.0	comp228861_c2.0_seq1	2.A.7	AT5G25400	NA	Nucleotide-sugar transporter family protein	nd	other	secretory pathway	VM
comp229921_c0.0	comp229921_c0.0_seq7	2.A.7	AT1G06470	NA	Nucleotide/sugar transporter family protein	nd	other	secretory pathway	VM
comp231138_c4	comp231138_c4_seq1	2.A.7	AT4G39390	ATNST-KT1, NST-K1	nucleotide sugar transporter-KT 1	nucleotide-sugar	sugar	secretory pathway	EN
comp130636_c0	comp130636_c0_seq1	2.A.7	AT5G19570	NA	unknown protein	nd	other	not assigned	ND
comp205949_c1	comp205949_c1_seq3	2.A.7	AT4G09810	AtURGT5	Nucleotide-sugar transporter family protein	nucleotide-sugar	sugar	secretory pathway	EN
comp223028_c0	comp223028_c0_seq1	2.A.7	AT4G09810	AtURGT5	Nucleotide-sugar transporter family protein	nucleotide-sugar	sugar	secretory pathway	EN
comp227694_c2.1	comp227694_c2.1_seq2	2.A.7	AT5G47470	NA	Nodulin MtN21 /EamA-like transporter family protein	nd	other	secretory pathway	EN
comp228374_c0	comp228374_c0_seq11	2.A.7	AT2G24220	ATPUP5, PUP5	purine permease 5	nd	other	secretory pathway	PM
comp230245_c1.1	comp230245_c1.1_seq14	2.A.7	AT5G55950	NA	Nucleotide/sugar transporter family protein	nd	other	not assigned	ND
comp231138_c3	comp231138_c3_seq1	2.A.7	AT4G09810	AtURGT5	Nucleotide-sugar transporter family protein	nucleotide-sugar	sugar	secretory pathway	EN
comp233289_c0.1	comp233289_c0.1_seq2	2.A.7	AT3G28050	NA	nodulin MtN21 /EamA-like transporter family protein	nd	small solute	plastid	PT
comp233477_c0.2	comp233477_c0.2_seq20	2.A.7	NOREF	NA	NOANNOT	nd	other	not assigned	ND
comp233184_c0	comp233184_c0_seq24	2.A.7	AT3G17430	NA	Nucleotide-sugar transporter family protein	nd	other	secretory pathway	EN
comp233424_c0	comp233424_c0_seq8	2.A.7	AT4G19185	NA	nodulin MtN21 /EamA-like transporter family protein	nd	small solute	not assigned	ND
comp216412_c0.1	comp216412_c0.1_seq1	2.A.71	AT5G10820	NA	Major facilitator superfamily protein	nd	other	not assigned	ND
comp234009_c0.0	comp234009_c0.0_seq2	2.A.72	AT5G14880	AtKUP8/AtHAK8/AtKT8	Potassium transporter family protein	potassium	cation	secretory pathway	PM
comp228117_c0	comp228117_c0_seq9	2.A.72	AT1G22460	NA	O-fucosyltransferase family protein	nd	other	secretory pathway	EN
comp223305_c0	comp223305_c0_seq3	2.A.82	AT3G05940	NA	Protein of unknown function (DUF300)	nd	other	secretory pathway	EN
comp223844_c2	comp223844_c2_seq1	2.A.84	AT5G17520	RCP1, MEX1	root cap 1 (RCP1)	carbohydrate	sugar	plastid	PT
comp212880_c0	comp212880_c0_seq6	2.A.85	AT3G18440	AtALMT9, ALMT9	aluminum-activated malate transporter 9	anion	anion	secretory pathway	PM
comp223915_c0.0	comp223915_c0.0_seq1	2.A.89	AT2G01770	VIT1, ATVIT1	vacuolar iron transporter 1	metal	metal	secretory pathway	VM
comp223385_c0.0	comp223385_c0.0_seq1	2.A.92	AT3G15380	AtCHER1/AtCTL1	Golgi choline transporter family protein	choline	metabolite	secretory pathway	PM
comp226966_c1.0	comp226966_c1.0_seq5	2.A.92	AT5G13760	NA	Plasma-membrane choline transporter family protein	nd	other	secretory pathway	PM
comp217916_c0.0	comp217916_c0.0_seq11	2.A.94	AT5G35730	NA	EXS (ERD1/XPR1/SYG1) family protein	nd	other	plastid	PT
comp229333_c3.2	comp229333_c3.2_seq33	2.A.97	AT5G06220	NA	LETM1-like protein	nd	other	plastid	PT
comp191402_c0.0	comp191402_c0.0_seq1	3.A.1	AT1G70610	AtABCB26, ATTAP1, TAP1	transporter associated with antigen processing protein 1	nd	other	plastid	PT
comp215064_c0	comp215064_c0_seq3	3.A.1	AT3G21580	AtABCI12	cobalt ion transmembrane transporters	nd	other	plastid	PT
comp224031_c1.1	comp224031_c1.1_seq1	3.A.1	AT1G17840	WBC11, ABCG11, DSO, COF1, ATWBC11	white-brown complex homolog protein 11	lipids	lipid	secretory pathway	PM
comp224716_c0	comp224716_c0_seq1	3.A.1	AT2G41700	ABCA1, AtABCA1	ATP-binding cassette A1	nd	other	plastid	PT
comp226321_c0.1	comp226321_c0.1_seq2	3.A.1	AT1G17840	WBC11, ABCG11, DSO, COF1, ATWBC11	white-brown complex homolog protein 11	lipids	lipid	secretory pathway	PM
comp227106_c0.0	comp227106_c0.0_seq1	3.A.1	AT1G54350	AtABCD2/AtPMP1	ABC transporter family protein	nd	other	plastid	PT
comp227916_c0	comp227916_c0_seq2	3.A.1	AT2G28070	AtABCG3/AtWBC3	ABC-2 type transporter family protein	nd	other	plastid	PT
comp229717_c1	comp229717_c1_seq1	3.A.1	AT3G16340	ATPDR1, PDR1	pleiotropic drug resistance 1	monolignol	metabolite	secretory pathway	PM
comp231238_c0	comp231238_c0_seq43	3.A.1	AT2G34660	ATMRP2, EST4, MRP2, ABCC2, AtABCC2	multidrug resistance-associated protein 2	PC-Cd	metal	secretory pathway	VM
comp231846_c0	comp231846_c0_seq1	3.A.1	AT3G60160	ATMRP9, MRP9, ABCC9	multidrug resistance-associated protein 9	nd	other	secretory pathway	PM
comp233074_c2.2	comp233074_c2.2_seq11	3.A.1	AT2G26910	PDR4, ATPDR4	pleiotropic drug resistance 4	nd	other	secretory pathway	PM
comp233860_c0.1	comp233860_c0.1_seq2	3.A.1	AT3G16340	AtABCG29, ATPDR1, PDR1	pleiotropic drug resistance 1	monolignol	metabolite	secretory pathway	PM
comp233937_c0.1	comp233937_c0.1_seq4	3.A.1	AT3G47730	ATATH1, ATH1, ABCA2	ATP-binding cassette A2	nd	other	not assigned	ND
comp234640_c1	comp234640_c1_seq1	3.A.1	AT3G21250	MRP6, ABCC8	multidrug resistance-associated protein 6	nd	other	not assigned	ND
comp224657_c0.1	comp224657_c0.1_seq1	3.A.1	AT2G01320	AtABCG7/AtWBC7	ABC-2 type transporter family protein	nd	other	not assigned	ND
comp227515_c0.0	comp227515_c0.0_seq5	3.A.1	AT4G25450	ATNAP8, NAP8	non-intrinsic ABC protein 8	nd	other	mitochondria	MT
comp234588_c1.1	comp234588_c1.1_seq6	3.A.1	AT3G20320	TGD2	trigalactosyldiacylglycerol2	lipid	lipid	plastid	PT
comp231649_c1.0	comp231649_c1.0_seq3	3.A.1	AT2G37010	ATNAP12, NAP12	non-intrinsic ABC protein 12	nd	other	secretory pathway	EN
comp232392_c6	comp232392_c6_seq1	3.A.10	AT1G15690	AtVHP1.1/AtAVP1/AtFUGU5	type I proton-translocating pyrophosphatase	H+-pump	cation	secretory pathway	VM
comp200826_c2	comp200826_c2_seq1	3.A.3	AT3G47950	AHA4, HA4	H()-ATPase 4	H+-pump	cation	secretory pathway	PM
comp201067_c0.0	comp201067_c0.0_seq1	3.A.3	AT5G21930	PAA2, HMA8, ATHMA8	P-type ATPase of Arabidopsis 2	metal-pump	metal	plastid	PT
comp218178_c0	comp218178_c0_seq1	3.A.3	AT1G17260	AHA10	autoinhibited H()-ATPase isoform 10	H+-pump	cation	secretory pathway	PM
comp226045_c4	comp226045_c4_seq1	3.A.3	AT5G62670	AHA11, HA11	H()-ATPase 11	H+-pump	cation	secretory pathway	PM
comp229157_c1	comp229157_c1_seq1	3.A.3	AT5G62670	AHA11, HA11	H()-ATPase 11	H+-pump	cation	secretory pathway	PM
comp232302_c1.0	comp232302_c1.0_seq1	3.A.3	AT4G37640	ACA2	calcium ATPase 2	ca2+-pump	cation	secretory pathway	EN
comp233782_c1.0	comp233782_c1.0_seq4	3.A.3	AT5G04930	ALA1	aminophospholipid ATPase 1	lipid-pump	lipid	secretory pathway	PM
comp233382_c0.0	comp233382_c0.0_seq11	3.A.3	AT3G25610	ATALA10	ATPase E1-E2 type family protein / haloacid dehalogenase-like hydrolase family protein	lipid	lipid	secretory pathway	PM
comp216814_c0	comp216814_c0_seq1	9.A.40	AT4G33700	NA	CBS domain-containing protein with a domain of unknown function (DUF21)	nd	other	secretory pathway	EN
comp229269_c1.0	comp229269_c1.0_seq8	9.A.40	AT1G47330	NA	CBS domain-containing protein with a domain of unknown function (DUF21)	nd	other	secretory pathway	EN
comp231896_c7.0	comp231896_c7.0_seq3	9.A.40	AT1G55930	NA	CBS domain-containing protein / transporter associated domain-containing protein	nd	other	plastid	PT
comp167696_c0	comp167696_c0_seq1	9.A.40	AT4G14240	NA	CBS domain-containing protein with a domain of unknown function (DUF21)	nd	other	not assigned	ND
comp185505_c0	comp185505_c0_seq1	9.A.40	AT4G14240	NA	CBS domain-containing protein with a domain of unknown function (DUF21)	nd	other	not assigned	ND
