# Supplementary material for: Venus flytrap carnivorous lifestyle builds on herbivore defense strategies
Source: HighWire-hosted journal article supplement (doi:10.1101/gr.202200.115), 2016-05-04
Supplement: Supplemental_Table_S16.xlsx [file Supplemental_Table_S16.xlsx]

## Sheet: Transportome Enrichment
Up regulated in Insect-stimulated glands
Down regulated in Insect-stimulated glands
Transporter Class (CRB against TCDB)
Class	P-Value	Q-Value
2.A	3.70092e-14	2.59065e-13
3.A	7.98396e-05	0.000279439
1.A	0.000240357	0.000560832
9.B	0.00720957	0.0126167
9.A	0.023835	0.033369
2.A	5.18446e-11	5.7029e-10
3.A	1.76422e-09	9.70321e-09
1.A	8.02555e-07	2.9427e-06
9.A	0.00169538	0.00371374
4.D	0.00180247	0.00371374
9.B	0.00202567	0.00371374
5.B	0.00396799	0.00623542
8.A	0.0242479	0.0333408
1.B	0.0633661	0.0774475
Transporter Substrate (Annotation: Manual Curation)
Class	P-Value	Q-Value
Nitrogen	0.00123002	0.00307505
Metal	0.00196628	0.00327714
Cation	0.00302054	0.00377568
Metabolite	0.0702657	0.0702657
Metabolite	4.20679e-06	8.41359e-06
Cation	8.89447e-05	0.000118593
Metal	0.000576337	0.000576337
Membrane Location (Annotation: Manual Curation)
Class	P-Value	Q-Value
Plasma Membrane	1.15922e-08	3.47766e-08
Endomembrane	0.0348904	0.0348904
Plasma Membrane	4.49428e-12	2.24714e-11
Plastid	5.24078e-10	1.31019e-09
Endomembrane	1.12028e-07	1.40034e-07
Vacuole	8.93068e-05	8.93068e-05
