# Supplementary material for: Venus flytrap carnivorous lifestyle builds on herbivore defense strategies
Source: HighWire-hosted journal article supplement (doi:10.1101/gr.202200.115), 2016-05-04
Supplement: Supplemental_Table_S17.xlsx [file Supplemental_Table_S17.xlsx]

## Sheet: Gem2Net Enrichment
Cluster ID	Stresses (Project ID)	P-Value	Q-Value
1425	Biotrophic Bacteria	1.20921e-05	0.00783568
127	Fungi	7.8989e-05	0.0255924
881	Oxidative Stress	0.000145471	0.0281458
1560	Necrotrophic Bacteria	0.000173739	0.0281458
554	Nitrogen	0.000381707	0.0459242
1135	Temperature	0.000425224	0.0459242
313	Heavy Metal	0.000521971	0.0483196
1414	Biotrophic Bacteria	0.00069163	0.056022
1334	Virus	0.000958541	0.0690149
