# Supplementary figures and images for: Venus flytrap carnivorous lifestyle builds on herbivore defense strategies
Source: HighWire-hosted journal article supplement (doi:10.1101/gr.202200.115), 2016-05-04

# THE DIONAEA HUNTING CYCLE

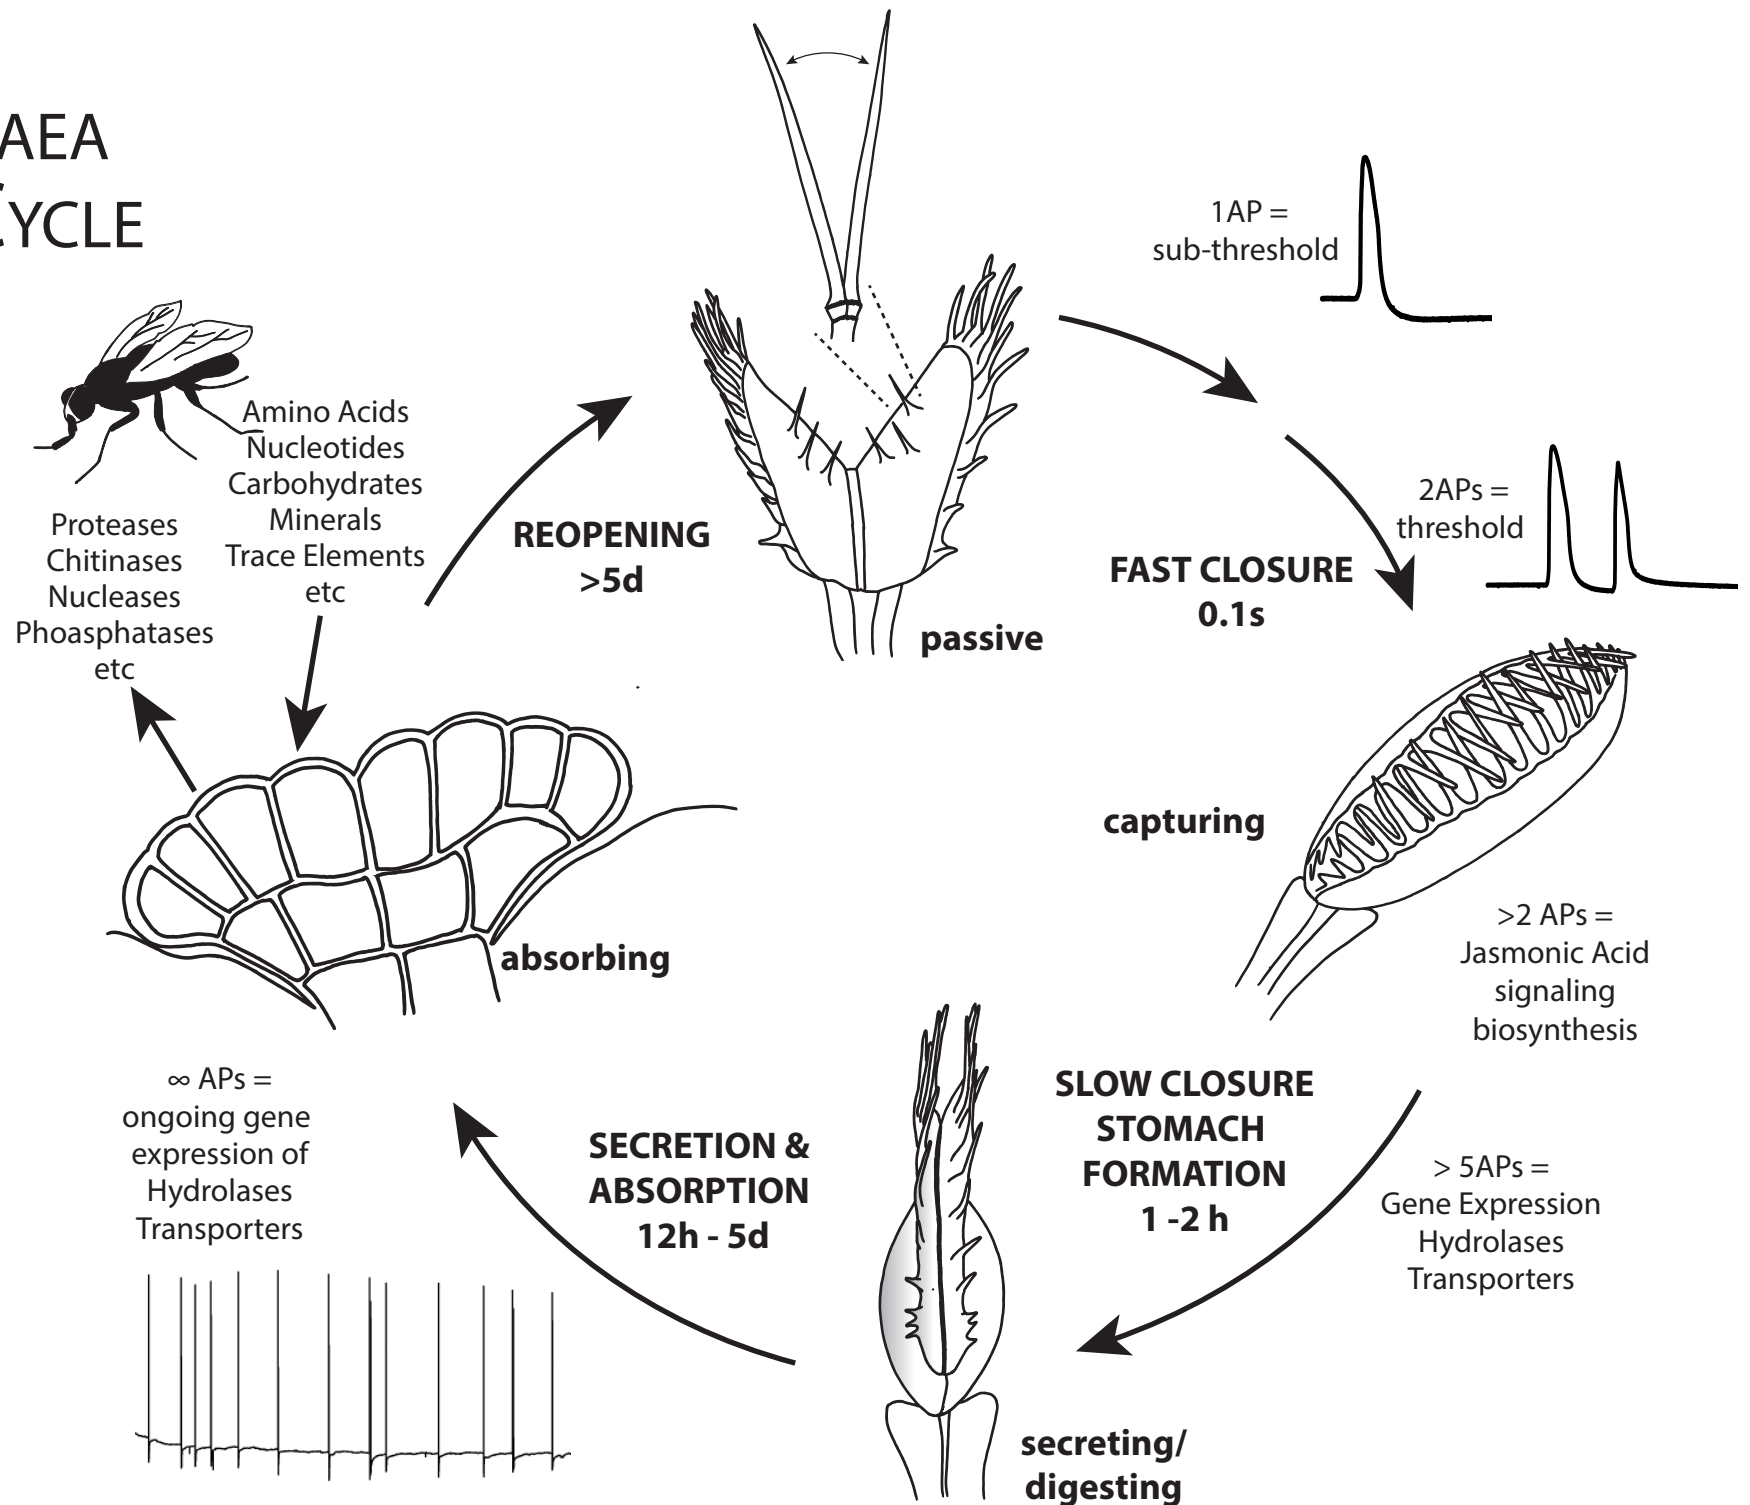

Supplement: Supplemental_Fig_S3.pdf [file Supplemental_Fig_S3.pdf]
